# Supplementary material for: Measuring progress in maternal and newborn health care in Mexico: validating indicators of health system contact and quality of care
Source: Springer Nature journal article supplement (doi:10.1186/s12884-016-1047-0), 2016-08-30
Supplement: MOESM2 [file 10632606]

**ANEXO II**

**CUESTIONARIO DE SALIDA A PACIENTES**

- ➔ Todas las preguntas se realizan esperando una respuesta espontánea a menos que se le indique que lea las posibilidades de respuesta.
- ➔ Para cada una de las preguntas a continuación, favor de marcar con una cruz en el recuadro que corresponda a la respuesta de la participante.
- ➔ En ocasiones se le pedirá que se salte algunas preguntas de este cuestionario. Cuando sea el caso, usted encontrará en la cuarta columna una nota que indica que pase a la siguiente pregunta con un flecha como la que se muestra a continuación:

|     |                                                                                                               |                                                                                   |       |
|-----|---------------------------------------------------------------------------------------------------------------|-----------------------------------------------------------------------------------|-------|
| 302 | ¿Su trabajo (dolores) de parto comenzó de forma espontánea o alguien intervino (hizo algo) para que iniciara? | ①. TRABAJO DE PARTO ESPONTÁNEO<br>②. ALGUIEN INTERVINO<br>③. NO SABE/ NO RECUERDA | ①→322 |
|-----|---------------------------------------------------------------------------------------------------------------|-----------------------------------------------------------------------------------|-------|

| No.                                          | PREGUNTA                                                                                                                                                                                                                                                                                                                                                                                                                                                                                       | CÓDIGO DE RESPUESTA                                                                                                                      | PATRÓN DE SALTO                              |
|----------------------------------------------|------------------------------------------------------------------------------------------------------------------------------------------------------------------------------------------------------------------------------------------------------------------------------------------------------------------------------------------------------------------------------------------------------------------------------------------------------------------------------------------------|------------------------------------------------------------------------------------------------------------------------------------------|----------------------------------------------|
| <b>SECCIÓN 1: INFORMACIÓN DE LA CARÁTULA</b> |                                                                                                                                                                                                                                                                                                                                                                                                                                                                                                |                                                                                                                                          |                                              |
| 101                                          | CÓDIGO DEL ENTREVISTADOR                                                                                                                                                                                                                                                                                                                                                                                                                                                                       | [ ][ ][ ][ ]                                                                                                                             |                                              |
| 102                                          | CÓDIGO DEL SITIO DE OBSERVACIÓN                                                                                                                                                                                                                                                                                                                                                                                                                                                                | [ ][ ]                                                                                                                                   |                                              |
| 103                                          | CÓDIGO DE LA PACIENTE                                                                                                                                                                                                                                                                                                                                                                                                                                                                          | [ ][ ][ ][ ][ ][ ]                                                                                                                       |                                              |
| 104                                          | FECHA DE LA ENTREVISTA                                                                                                                                                                                                                                                                                                                                                                                                                                                                         | [ ][ ][ ][ ][ ] DD MM AA                                                                                                                 |                                              |
| 105                                          | RESULTADO DE LA ENTREVISTA<br>➤ COMPLETAR UNA VEZ FINALIZADA LA OBSERVACIÓN                                                                                                                                                                                                                                                                                                                                                                                                                    | ①. COMPLETADA<br>②. COMPLETADA PARCIALMENTE<br>③. RECHAZA ENTREVISTA<br>④. MUJER INCAPACITADA<br>⑤. ALTA VOLUNTARIA<br>⑥. MUJER FALLECIÓ | →FIN<br>→FIN<br>→FIN<br>→FIN<br>→FIN<br>→FIN |
| 106                                          | HORA EN LA QUE INICIA LA ENTREVISTA<br>➤ UTILICE EL RELOJ DE 24 HORAS                                                                                                                                                                                                                                                                                                                                                                                                                          | HORAS [ ][ ]<br>MINUTOS [ ][ ]                                                                                                           |                                              |
| 107                                          | LE AGRADEZCO HABER ACEPTADO PLATICAR HOY CONMIGO. COMO RECORDARÁ, USTED ACEPTÓ SER ENTREVISTADA SOBRE SU PARTO/CESÁREA. LAS PREGUNTAS QUE LE HARÉ TOMARÁN 30 MINUTOS COMO MÁXIMO. SI HAY ALGO QUE NO ENTIENDE, NO DUDE EN HACERME CUALQUIER PREGUNTA.<br><br>LE DAREMOS UN [VALE DE DESPENSA] DE REGALO COMO AGRADECIMIENTO POR SU TIEMPO, ACEPTE O NO SER ENTREVISTADA.<br>¿TIENE ALGUNA PREGUNTA? ¿TENGO SU PERMISO PARA CONTINUAR?<br><br><input type="radio"/> SÍ <input type="radio"/> NO | .....<br>Firma del entrevistador<br>(Indica que la entrevistada está de acuerdo en participar)                                           |                                              |

TdP: Trabajo de parto

**ANEXO II**

**CUESTIONARIO DE SALIDA A PACIENTES**

| No.                                              | PREGUNTA/ ACCIÓN                                                                | CÓDIGO DE RESPUESTA                                                                                                                          | SALTAR A |
|--------------------------------------------------|---------------------------------------------------------------------------------|----------------------------------------------------------------------------------------------------------------------------------------------|----------|
| <b>SECCIÓN 2: INFORMACION SOBRE ANTECEDENTES</b> |                                                                                 |                                                                                                                                              |          |
| 201                                              | ¿Qué edad tiene?<br>► Sondear si no sabe.<br>► Estime una edad si es necesario. | <input type="text"/> <input type="text"/> EDAD EN AÑOS                                                                                       |          |
| 202                                              | ¿Cuál es su nivel máximo de estudios?                                           | ①. NINGUNO<br>①. PRIMARIA<br>②. SECUNDARIA<br>③. PREPARATORIA/ ESCUELA TÉC.<br>④. UNIVERSIDAD<br>⑤. OTRO<br>ESPECIFICAR: .....<br>⑥. NO SABE |          |
| 203                                              | ¿Cuál es su estado civil?                                                       | ①. SOLTERA, NUNCA SE HA CASADO<br>②. CASADA<br>③. EN UNIÓN LIBRE<br>④. SEPARADA<br>⑤. DIVORCIADA<br>⑥. VIUDA                                 |          |
| 204                                              | ¿Cuántos hijos vivos ha tenido?                                                 | <input type="text"/> <input type="text"/><br>NÚMERO TOTAL DE HIJOS VIVOS                                                                     |          |

ANEXO II

CUESTIONARIO DE SALIDA A PACIENTES

➔ Proveedor de salud es sinónimo de personal de salud que atendió el trabajo de parto y parto en el Hospital General de México

| No.                                            | PREGUNTA/ ACCIÓN                                                                                                                                       | CÓDIGO DE RESPUESTA                                                                                                                                                                                                                                                                                                                                      | SALTAR A |
|------------------------------------------------|--------------------------------------------------------------------------------------------------------------------------------------------------------|----------------------------------------------------------------------------------------------------------------------------------------------------------------------------------------------------------------------------------------------------------------------------------------------------------------------------------------------------------|----------|
| <b>SECCIÓN 3: TRABAJO DE PARTO Y EXPULSION</b> |                                                                                                                                                        |                                                                                                                                                                                                                                                                                                                                                          |          |
| 301                                            | ENTREVISTADOR, REGISTRE SI EL BEBE ESTA VIVO O NO                                                                                                      | ①. SÍ    ②. NO                                                                                                                                                                                                                                                                                                                                           |          |
| 302                                            | ¿Cuál fue el resultado de su parto? ¿su bebé nació vivo o muerto?<br>► Si la mujer tuvo gemelos, registre la respuesta para el 2do gemelo solamente    | ①. NACIDO VIVO<br>②. ÓBITO (NACÍÓ MUERTO)                                                                                                                                                                                                                                                                                                                | ①→304    |
| 303                                            | ¿Sabe si su bebé murió antes de comenzar con los dolores/contracciones/trabajo de parto?                                                               | ①.SÍ    ②.NO    ③.NO SABE                                                                                                                                                                                                                                                                                                                                |          |
| 304                                            | ¿Le mostraron a su bebé cuando nació?                                                                                                                  | ①.SÍ    ②.NO    ③.NO SABE                                                                                                                                                                                                                                                                                                                                |          |
| 305                                            | ¿Cuándo empezaron sus dolores de parto?<br>¿Empezaron en la casa, en camino al hospital, en el hospital?                                               | ①. CASA<br>②. DE CAMINO AL HOSPITAL<br>③. YA EN EL HOSPITAL<br>④. NUNCA INICIÓ TRABAJO DE PARTO<br>⑤. NO SABE/ NO SE ACUERDA                                                                                                                                                                                                                             |          |
| 306                                            | ¿Vino a este hospital porque se presentó algún problema durante su trabajo de parto o tenía planeado que su bebé naciera aquí?                         | ①. SÍ, TUVE UN PROBLEMA<br>②. NO, PLANEABA VENIR<br>③. NO SABE                                                                                                                                                                                                                                                                                           |          |
| 307                                            | ¿Tuvo alguna de las siguientes complicaciones durante o después del parto?<br>► Posibilidad de varias respuestas. Lea y marque todas las que apliquen. | ①. PRESION ALTA/<br>CONVULSIONES/VISION BORROSA/<br>DOLOR DE CABEZA INTENSO<br>②. PIES/MANOS HINCHADOS<br>③. SUFRIMIENTO FETAL /BEBE<br>DEMASIADO GRANDE<br>④. PARTO DEMASIADO<br>PROLONGADO (MAS DE 12 HORAS)<br>⑤. SANGRADO EXCESIVO<br>⑥. INFECCION (FIEBRE)<br>⑦. OTRAS COMPLICACIONES,<br>ESPECIFICAR: .....<br>⑧. SIN COMPLICACIONES<br>⑨. NO SABE |          |

ANEXO II

CUESTIONARIO DE SALIDA A PACIENTES

| No.                                            | PREGUNTA/ ACCIÓN                                                                                                                                                                                                                                                                                       | CÓDIGO DE RESPUESTA                                                                                                                                                                                                                                                                                                                                                              | SALTAR A |
|------------------------------------------------|--------------------------------------------------------------------------------------------------------------------------------------------------------------------------------------------------------------------------------------------------------------------------------------------------------|----------------------------------------------------------------------------------------------------------------------------------------------------------------------------------------------------------------------------------------------------------------------------------------------------------------------------------------------------------------------------------|----------|
| <b>SECCIÓN 3: TRABAJO DE PARTO Y EXPULSION</b> |                                                                                                                                                                                                                                                                                                        |                                                                                                                                                                                                                                                                                                                                                                                  |          |
| 308                                            | <p>¿Puede decirme en qué tipo de hospital nació su bebé?</p> <p>► Sondear para identificar el tipo de institución.</p> <p>► En caso de que la mujer no pueda determinar si es público o privado, anote el nombre del lugar de acuerdo a lo que reporte la mujer.</p> <p>.....<br/>Nombre del lugar</p> | <p><b>SECTOR PÚBLICO</b></p> <p>①. HOSPITAL DE GOBIERNO<br/>②. CLÍNICA/ CENTRO DE SALUD DE GOBIERNO<br/>③. PUESTO DE SALUD DEL GOBIERNO<br/>④. OTRA INSTITUCIÓN DEL SECTOR PÚBLICO<br/>ESPECIFICAR: .....</p> <p><b>SECTOR PRIVADO</b></p> <p>⑤. HOSPITAL PRIVADO<br/>⑥. CLÍNICA PRIVADA<br/>⑦. CASA MATERNA PRIVADA<br/>⑧. OTRA INSTITUCIÓN PRIVADA,<br/>ESPECIFICAR: .....</p> |          |
| 309                                            | ¿Le tomaron la presión al momento, o poco después, de ser admitida al hospital?                                                                                                                                                                                                                        | <p>①.SÍ<br/>②.NO<br/>⑧.NO SABE/ NO RECUERDA</p>                                                                                                                                                                                                                                                                                                                                  |          |
| 310                                            | ¿Le pidieron una muestra de orina al momento, o poco después, de ser admitida al hospital?                                                                                                                                                                                                             | <p>①.SÍ<br/>②.NO<br/>⑧.NO SABE/ NO RECUERDA</p>                                                                                                                                                                                                                                                                                                                                  |          |
| 311                                            | ¿Le revisaron los latidos del corazón del bebé al momento, o poco después, de ser admitida al hospital?                                                                                                                                                                                                | <p>①.SÍ<br/>②.NO<br/>⑧.NO SABE/ NO RECUERDA</p>                                                                                                                                                                                                                                                                                                                                  |          |
| 312                                            | ¿Le hicieron un ultrasonido al momento, o poco después, de ser admitida al hospital?                                                                                                                                                                                                                   | <p>①.SÍ<br/>②.NO<br/>⑧.NO SABE/ NO RECUERDA</p>                                                                                                                                                                                                                                                                                                                                  |          |
| 313                                            | <p>► Ahora le haré unas preguntas sobre VIH. Sin embargo, le aclaro de antemano que no le preguntaré si usted es VIH positiva</p> <p>¿Durante su hospitalización para este parto, le preguntaron si tiene VIH?</p>                                                                                     | <p>①.SÍ<br/>②.NO<br/>⑧.NO SABE/ NO RECUERDA</p>                                                                                                                                                                                                                                                                                                                                  |          |
| 314                                            | ¿Durante su hospitalización para este parto, le ofrecieron hacerse una prueba de VIH?                                                                                                                                                                                                                  | <p>①.SÍ<br/>②.NO<br/>⑧.NO SABE/ NO RECUERDA</p>                                                                                                                                                                                                                                                                                                                                  |          |
| 315                                            | ¿Durante su hospitalización para este parto, le realizaron una prueba de VIH?                                                                                                                                                                                                                          | <p>①.SÍ<br/>②.NO<br/>⑧.NO SABE/ NO RECUERDA</p>                                                                                                                                                                                                                                                                                                                                  |          |

ANEXO II

CUESTIONARIO DE SALIDA A PACIENTES

| No. | PREGUNTA/ ACCIÓN | CÓDIGO DE RESPUESTA | SALTAR A |
|-----|------------------|---------------------|----------|
|-----|------------------|---------------------|----------|

SECCIÓN 3: TRABAJO DE PARTO Y EXPULSION

|     |                                                                                                                                                                                                                                                                            |                                                                                                                                                                                                                                                       |  |
|-----|----------------------------------------------------------------------------------------------------------------------------------------------------------------------------------------------------------------------------------------------------------------------------|-------------------------------------------------------------------------------------------------------------------------------------------------------------------------------------------------------------------------------------------------------|--|
| 316 | <p>¿Cuál fue el PRINCIPAL PROVEEDOR DE SALUD que atendió EL TRABAJO DE PARTO?</p> <ul style="list-style-type: none"> <li>► Esperar respuesta espontánea de la mujer</li> <li>► Por favor especificar solo la persona principal que atendió el trabajo de parto.</li> </ul> | <p>①. MÉDICO<br/>②. MÉDICO GINECÓLOGO<br/>③. MÉDICO RESIDENTE<br/>④. MÉDICO INTERNO<br/>⑤. ESTUDIANTE DE MEDICINA<br/>⑥. ENFERMERA<br/>⑦. PASANTE DE ENFERMERÍA<br/>⑧. ESTUDIANTE DE ENFERMERÍA<br/>⑨. PARTERA<br/>⑩. OTRO<br/>ESPECIFICAR: .....</p> |  |
|-----|----------------------------------------------------------------------------------------------------------------------------------------------------------------------------------------------------------------------------------------------------------------------------|-------------------------------------------------------------------------------------------------------------------------------------------------------------------------------------------------------------------------------------------------------|--|

|     |                                                                                                                                                                                                                                                                                          |                                                                                                                                                                                                                                                       |  |
|-----|------------------------------------------------------------------------------------------------------------------------------------------------------------------------------------------------------------------------------------------------------------------------------------------|-------------------------------------------------------------------------------------------------------------------------------------------------------------------------------------------------------------------------------------------------------|--|
| 317 | <p>¿Hubieron OTROS PROVEEDORES DE SALUD que atendieron EL TRABAJO DE PARTO?</p> <ul style="list-style-type: none"> <li>► Esperar respuesta espontánea de la mujer</li> <li>► Enliste todos los proveedores que atendieron el trabajo de parto aparte de la persona principal.</li> </ul> | <p>①. MÉDICO<br/>②. MÉDICO GINECÓLOGO<br/>③. MÉDICO RESIDENTE<br/>④. MÉDICO INTERNO<br/>⑤. ESTUDIANTE DE MEDICINA<br/>⑥. ENFERMERA<br/>⑦. PASANTE DE ENFERMERÍA<br/>⑧. ESTUDIANTE DE ENFERMERÍA<br/>⑨. PARTERA<br/>⑩. OTRO<br/>ESPECIFICAR: .....</p> |  |
|-----|------------------------------------------------------------------------------------------------------------------------------------------------------------------------------------------------------------------------------------------------------------------------------------------|-------------------------------------------------------------------------------------------------------------------------------------------------------------------------------------------------------------------------------------------------------|--|

|     |                                                                                                                                                                                                                                                      |                                                                                                                                                                                                                                                       |  |
|-----|------------------------------------------------------------------------------------------------------------------------------------------------------------------------------------------------------------------------------------------------------|-------------------------------------------------------------------------------------------------------------------------------------------------------------------------------------------------------------------------------------------------------|--|
| 318 | <p>¿Cuál fue el PRINCIPAL PROVEEDOR DE SALUD que atendió EL PARTO?</p> <ul style="list-style-type: none"> <li>► Esperar respuesta espontánea de la mujer</li> <li>► Por favor especificar solo la persona principal que atendió el parto.</li> </ul> | <p>①. MÉDICO<br/>②. MÉDICO GINECÓLOGO<br/>③. MÉDICO RESIDENTE<br/>④. MÉDICO INTERNO<br/>⑤. ESTUDIANTE DE MEDICINA<br/>⑥. ENFERMERA<br/>⑦. PASANTE DE ENFERMERÍA<br/>⑧. ESTUDIANTE DE ENFERMERÍA<br/>⑨. PARTERA<br/>⑩. OTRO<br/>ESPECIFICAR: .....</p> |  |
|-----|------------------------------------------------------------------------------------------------------------------------------------------------------------------------------------------------------------------------------------------------------|-------------------------------------------------------------------------------------------------------------------------------------------------------------------------------------------------------------------------------------------------------|--|

|     |                                                                                                                                                                                                                                                                    |                                                                                                                                                                                                                                                       |  |
|-----|--------------------------------------------------------------------------------------------------------------------------------------------------------------------------------------------------------------------------------------------------------------------|-------------------------------------------------------------------------------------------------------------------------------------------------------------------------------------------------------------------------------------------------------|--|
| 319 | <p>¿Hubieron otros PROVEEDORES DE SALUD que atendieron EL PARTO?</p> <ul style="list-style-type: none"> <li>► Esperar respuesta espontánea de la mujer</li> <li>► Enliste todos los proveedores que atendieron el parto aparte de la persona principal.</li> </ul> | <p>①. MÉDICO<br/>②. MÉDICO GINECÓLOGO<br/>③. MÉDICO RESIDENTE<br/>④. MÉDICO INTERNO<br/>⑤. ESTUDIANTE DE MEDICINA<br/>⑥. ENFERMERA<br/>⑦. PASANTE DE ENFERMERÍA<br/>⑧. ESTUDIANTE DE ENFERMERÍA<br/>⑨. PARTERA<br/>⑩. OTRO<br/>ESPECIFICAR: .....</p> |  |
|-----|--------------------------------------------------------------------------------------------------------------------------------------------------------------------------------------------------------------------------------------------------------------------|-------------------------------------------------------------------------------------------------------------------------------------------------------------------------------------------------------------------------------------------------------|--|

ANEXO II

CUESTIONARIO DE SALIDA A PACIENTES

| No.                                            | PREGUNTA/ ACCIÓN                                                                                                                                                                                                                                                                     | CÓDIGO DE RESPUESTA                                                                                                                                                                                                                                   | SALTAR A |
|------------------------------------------------|--------------------------------------------------------------------------------------------------------------------------------------------------------------------------------------------------------------------------------------------------------------------------------------|-------------------------------------------------------------------------------------------------------------------------------------------------------------------------------------------------------------------------------------------------------|----------|
| <b>SECCIÓN 3: TRABAJO DE PARTO Y EXPULSION</b> |                                                                                                                                                                                                                                                                                      |                                                                                                                                                                                                                                                       |          |
| 320                                            | <p>¿Quién fue el PRINCIPAL PROVEEDOR DE SALUD que la atendió CUANDO NACIÓ SU BEBÉ (QUIÉN RECIBIÓ AL BEBÉ)?</p> <p>► Esperar respuesta espontánea de la mujer.<br/>► Por favor especificar solo la persona principal que la atendió cuando su bebé nació (quién recibió al bebé).</p> | <p>①. MÉDICO<br/>②. MÉDICO GINECÓLOGO<br/>③. MÉDICO RESIDENTE<br/>④. MÉDICO INTERNO<br/>⑤. ESTUDIANTE DE MEDICINA<br/>⑥. ENFERMERA<br/>⑦. PASANTE DE ENFERMERÍA<br/>⑧. ESTUDIANTE DE ENFERMERÍA<br/>⑨. PARTERA<br/>⑩. OTRO<br/>ESPECIFICAR: .....</p> |          |
| 321                                            | <p>¿En total, cuántos proveedores de salud atendieron su parto?</p>                                                                                                                                                                                                                  | <input type="text"/> <input type="text"/>                                                                                                                                                                                                             |          |
| 322                                            | <p>Su trabajo (dolores) de parto comenzó de forma espontánea o alguien intervino (hizo algo) para que iniciara?</p>                                                                                                                                                                  | <p>①. TRABAJO DE PARTO ESPONTÁNEO<br/>②. ALGUIEN INTERVINO<br/>⑧. NO SABE/ NO RECUERDA</p>                                                                                                                                                            | ①→324    |
| 323                                            | <p>¿Qué le hicieron para que iniciara su trabajo de parto?</p>                                                                                                                                                                                                                       | <p>①. COLOCARON LÍNEA IV EN BRAZO<br/>②. RUPTURA DE MEMBRANAS<br/>⑧. OTRO, ESPECIFICAR:<br/>.....</p>                                                                                                                                                 |          |
| 324                                            | <p>¿Le permitieron tener un acompañante durante el trabajo de parto y nacimiento de su bebé?</p>                                                                                                                                                                                     | <p>①. SÍ<br/>②. NO<br/>⑧. NO SABE/ NO SE ACUERDA</p>                                                                                                                                                                                                  |          |
| 325                                            | <p>¿Tuvo un acompañante durante el trabajo de parto y nacimiento de su bebé?</p>                                                                                                                                                                                                     | <p>①. SÍ<br/>②. NO<br/>⑧. NO SABE/ NO SE ACUERDA</p>                                                                                                                                                                                                  | ②→327    |
| 326                                            | <p>¿A quién eligió como acompañante durante el trabajo de parto y nacimiento de su bebé?</p> <p>► Posibilidad de varias respuestas.</p>                                                                                                                                              | <p>①. MADRE<br/>②. SUEGRA<br/>③. HERMANA<br/>④. CUÑADA<br/>⑤. ESPOSO/ PAREJA<br/>⑥. OTRO MIEMBRO DE LA FAMILIA<br/>⑦. PARTERA TRADICIONAL<br/>⑧. OTRO<br/>ESPECIFICAR: .....</p>                                                                      |          |
| 327                                            | <p>¿Le permitieron pararse a caminar durante el trabajo de parto?</p>                                                                                                                                                                                                                | <p>①. SÍ<br/>②. NO<br/>⑧. NO SABE/ NO SE ACUERDA</p>                                                                                                                                                                                                  |          |
| 328                                            | <p>¿Se paró a caminar durante el trabajo de parto?</p>                                                                                                                                                                                                                               | <p>①. SÍ<br/>②. NO<br/>⑧. NO SABE/ NO SE ACUERDA</p>                                                                                                                                                                                                  |          |

**ANEXO II**

**CUESTIONARIO DE SALIDA A PACIENTES**

| No.                                            | PREGUNTA/ ACCIÓN                                                                                                                                                                                | CÓDIGO DE RESPUESTA                                                                                                                        | SALTAR A |
|------------------------------------------------|-------------------------------------------------------------------------------------------------------------------------------------------------------------------------------------------------|--------------------------------------------------------------------------------------------------------------------------------------------|----------|
| <b>SECCIÓN 3: TRABAJO DE PARTO Y EXPULSION</b> |                                                                                                                                                                                                 |                                                                                                                                            |          |
| 329                                            | ¿Le permitieron tomar líquidos o comer algo durante el trabajo de parto?                                                                                                                        | ①. SÍ<br>②. NO<br>③. NO SABE/ NO SE ACUERDA                                                                                                |          |
| 330                                            | ¿Tomó líquidos o comió algo durante el trabajo de parto?                                                                                                                                        | ①. SÍ<br>②. NO<br>③. NO SABE/ NO SE ACUERDA                                                                                                |          |
| 331                                            | ¿Le hicieron algo para acelerar o fortalecer sus dolores / el trabajo de parto para el nacimiento del bebé?                                                                                     | ①. SÍ<br>②. NO<br>③. NO SABE/ NO SE ACUERDA                                                                                                | ④→333    |
| 332                                            | ¿Qué le hicieron para acelerar o fortalecer sus dolores/ el trabajo de parto?                                                                                                                   | ①. RECIBIÓ INYECCIÓN DURANTE TdP<br>②. MEDICAMENTO IV DURANTE EL TdP<br>③. RUPTURA DE MEMBRANAS<br>④. OTRO<br>ESPECIFICAR: .....           |          |
| 333                                            | ANTES DE QUE NACIERA SU BEBE, ¿recibió alguna inyección o medicamento IV durante el trabajo de parto?                                                                                           | ①. SÍ<br>②. NO<br>③. NO SABE/ NO SE ACUERDA                                                                                                |          |
| 334                                            | ¿Los proveedores de salud se lavaron las manos con agua y jabón o usaron antiséptico antes de revisarla?                                                                                        | ①. SÍ<br>②. NO<br>③. NO SABE/ NO SE ACUERDA                                                                                                |          |
| 335                                            | ¿Los proveedores de salud utilizaron guantes de latex para realizarle tactos vaginales?                                                                                                         | ①. SÍ, SIEMPRE<br>②. SÍ, ALGUNAS VECES<br>③. NO<br>④. NO SABE/ NO RECUERDA                                                                 |          |
| 336                                            | ¿Algún proveedor de salud le preguntó en qué posición quería estar usted durante el trabajo de parto o para el nacimiento de su bebé?                                                           | ①. SÍ<br>②. NO<br>③. NO SABE/ NO SE ACUERDA                                                                                                |          |
| 337                                            | ¿En qué posición se encontraba para el parto? Es decir, ¿estaba acostada boca arriba, semi sentada, acostada de su lado izquierdo, sobre sus manos y rodillas, en cuclillas o en otra posición? | ①. BOCA ARRIBA<br>②. SEMI-SENTADA<br>③. DECÚBITO LATERAL IZQUIERDO<br>④. SOBRE MANOS Y RODILLAS<br>⑤. CUCLILLAS<br>⑥. OTRA<br>ESPECIFICAR: |          |
| 338                                            | ¿Su bebé nació por cesárea? Es decir, ¿le abrieron por la viente (panza) para sacar al bebé?<br>► Entrevistador(a), explique la diferencia entre cesarea y episiotomia                          | ①. SÍ<br>②. NO<br>③. NO SABE/ NO SE ACUERDA                                                                                                | ④→343    |

ANEXO II

CUESTIONARIO DE SALIDA A PACIENTES

| No.                                                                                   | PREGUNTA/ ACCIÓN                                                                                                                                             | CÓDIGO DE RESPUESTA                                                                                                                                                                                                                                                                                                       | SALTAR A |
|---------------------------------------------------------------------------------------|--------------------------------------------------------------------------------------------------------------------------------------------------------------|---------------------------------------------------------------------------------------------------------------------------------------------------------------------------------------------------------------------------------------------------------------------------------------------------------------------------|----------|
| <b>SECCIÓN 3: TRABAJO DE PARTO Y EXPULSION</b>                                        |                                                                                                                                                              |                                                                                                                                                                                                                                                                                                                           |          |
| 339                                                                                   | ¿Le hicieron la cesárea antes de que iniciara su trabajo de parto o después de que comenzó                                                                   | ①. ANTES DE INICIAR EL TdP<br>②. DESPUÉS DE INICIAR EL TdP<br>⑧. NO SABE/ NO SE ACUERDA                                                                                                                                                                                                                                   |          |
| 340                                                                                   | ¿Cuál fue la razón para que le hicieran la cesárea?                                                                                                          | ①. EL DOCTOR/ ENFERMERA ME DIJO QUE LA TENÍAN QUE HACER<br>②. ESTABA SANGRANDO<br>③. EL BEBÉ ESTABA ATORADO<br>④. LLEVABA DEMASIADO TIEMPO EN TdP<br>⑤. LA POSICIÓN DEL BEBÉ NO ERA CORRECTA<br>⑥. TENÍA UNA ENFERMEDAD<br>⑦. MI MATRIZ ESTABA ROTA<br>⑧. EL BEBÉ TENÍA PROBLEMAS<br>⑨. NO HABÍA RAZÓN MÉDICA<br>⑩. NO SÉ |          |
| 341                                                                                   | ¿En qué momento se tomó la decisión de hacer la cesárea?                                                                                                     | ①. ANTES DE INICIAR EL TdP<br>②. DESPUÉS DE INICIAR EL TdP<br>⑧. NO SABE/ NO SE ACUERDA                                                                                                                                                                                                                                   |          |
| 342                                                                                   | ¿Quién decidió que se haría una cesárea?                                                                                                                     | ①. DOCTOR/ PROVEEDOR<br>②. YO MISMA<br>⑧. NO SABE/ NO SE ACUERDA                                                                                                                                                                                                                                                          |          |
| 343                                                                                   | Para el parto, poco antes del nacimiento del bebé, ¿le cortaron la abertura de la vagina (episiotomía) para hacerle más espacio para la cabeza del bebé?     | ①. SÍ<br>②. NO<br>⑧. NO SABE/ NO SE ACUERDA                                                                                                                                                                                                                                                                               |          |
| <b>REVISE LA RESPUESTA 338. SI EL BEBÉ NACIO POR CESÁREA, SIGA A LA PREGUNTA 358.</b> |                                                                                                                                                              |                                                                                                                                                                                                                                                                                                                           |          |
| 344                                                                                   | ¿Los proveedores de salud se lavaron las manos con agua y jabón o usaron antiséptico antes de atender el parto?                                              | ①. SÍ<br>②. NO<br>⑧. NO SABE/ NO SE ACUERDA                                                                                                                                                                                                                                                                               |          |
| 345                                                                                   | ¿Los proveedores de salud utilizaron guantes de latex para atender el parto?<br>► En caso que la respuesta sea “Sí”, ¿fue siempre o sólo algunas veces?      | ①. SÍ, SIEMPRE<br>②. SÍ, ALGUNAS VECES<br>③. NO<br>⑧. NO SABE/ NO RECUERDA                                                                                                                                                                                                                                                |          |
| 346                                                                                   | ¿Los proveedores de salud utilizaron guantes de latex para manipular la placenta?<br>► En caso que la respuesta sea “Sí”, ¿fue siempre o sólo algunas veces? | ①. SÍ, SIEMPRE<br>②. SÍ, ALGUNAS VECES<br>③. NO<br>⑧. NO SABE/ NO RECUERDA                                                                                                                                                                                                                                                |          |



ANEXO II

CUESTIONARIO DE SALIDA A PACIENTES

| No.                                                                                                                                                           | PREGUNTA/ ACCIÓN                                                                                                                                                                                                  | CÓDIGO DE RESPUESTA                                                                            | SALTAR A |
|---------------------------------------------------------------------------------------------------------------------------------------------------------------|-------------------------------------------------------------------------------------------------------------------------------------------------------------------------------------------------------------------|------------------------------------------------------------------------------------------------|----------|
| <b>SECCIÓN 3: TRABAJO DE PARTO Y EXPULSION</b>                                                                                                                |                                                                                                                                                                                                                   |                                                                                                |          |
| <b>Ahora le haré algunas preguntas sobre usted y su bebé, inmediatamente después del nacimiento. (EN CASO DE GEMELOS, REFERIRSE AL 2<sup>do</sup> GEMELO)</b> |                                                                                                                                                                                                                   |                                                                                                |          |
| 347                                                                                                                                                           | <i>Inmediatamente después del nacimiento de su bebé</i><br>¿Alguien le puso una inyección en el muslo o en el glúteo ( nalga) durante los primeros minutos después del parto?                                     | ①. SÍ<br>②. NO<br>⑧. NO SABE/ NO SE ACUERDA                                                    | ①→351    |
| 348                                                                                                                                                           | <i>Inmediatamente después del nacimiento de su bebé</i><br>¿Alguien le dio un medicamento intravenoso (por una manguerita en su brazo) durante los primeros minutos después del parto?                            | ①. SÍ<br>②. NO<br>⑧. NO SABE/ NO SE ACUERDA                                                    | ①→351    |
| 349                                                                                                                                                           | <i>Inmediatamente después del nacimiento de su bebé</i><br>¿Alguien le dio unas pastillas para tragar o para mantener en su boca durante los primeros minutos después del parto?                                  | ①. SÍ<br>②. NO<br>⑧. NO SABE/ NO SE ACUERDA                                                    | ①→351    |
| 350                                                                                                                                                           | <i>Inmediatamente después del nacimiento de su bebé</i><br>¿Alguien le colocó unas pastillas por el recto durante los primeros minutos después del parto?                                                         | ①. SÍ<br>②. NO<br>⑧. NO SABE/ NO SE ACUERDA                                                    |          |
| 351                                                                                                                                                           | <i>Inmediatamente después del nacimiento de su bebé</i><br>¿Alguien le dio un medicamento llamado <i>oxitocina</i> para ayudar a que su matriz se contrajera / se endureciera?                                    | ①. SÍ<br>②. NO<br>⑧. NO SABE/ NO SE ACUERDA                                                    |          |
| 352                                                                                                                                                           | <b>SI CONTESTO SI A CUALQUIERA DE LAS 5 PREGUNTAS PREVIAS:</b><br>¿Se acuerda si le dieron un medicamento / inyección llamada <i>oxitocina</i> ANTES de que expulsara la placenta?                                | ①. SÍ<br>②. NO<br>③. PLACENTA SALIÓ INMEDIATAMENTE DESPUÉS DEL BEBÉ<br>⑧. NO SABE/ NO RECUERDA |          |
| 353                                                                                                                                                           | Después de que nació su bebé, ¿el proveedor le ayudó a que expulsara la placenta? Es decir, ¿el proveedor colocó una mano firmemente sobre su abdomen bajo mientras sostuvo el cordón umbilical con la otra mano? | ①. SÍ<br>②. NO<br>③. PLACENTA SALIÓ INMEDIATAMENTE DESPUÉS DEL BEBÉ<br>③. NO SABE/ NO RECUERDA |          |
| 354                                                                                                                                                           | Después de que nació su bebé, ¿le pusieron una inyección en el muslo en los primeros minutos <i>después de que expulsó la placenta</i> ?                                                                          | ①. SÍ<br>②. NO<br>⑧. NO SABE/ NO SE ACUERDA                                                    | ①→356    |
| 355                                                                                                                                                           | Después de que nació su bebé, ¿le dieron unas pastillas para tragar o mantener en su boca, en los primeros minutos <i>después de que expulsó la placenta</i> ?                                                    | ①. SÍ<br>②. NO<br>⑧. NO SABE/ NO SE ACUERDA                                                    |          |

ANEXO II

CUESTIONARIO DE SALIDA A PACIENTES

| No.                                                                                                            | PREGUNTA/ ACCIÓN                                                                                                                                                                      | CÓDIGO DE RESPUESTA                                                                                      | SALTAR A |
|----------------------------------------------------------------------------------------------------------------|---------------------------------------------------------------------------------------------------------------------------------------------------------------------------------------|----------------------------------------------------------------------------------------------------------|----------|
| <b>SECCIÓN 3: TRABAJO DE PARTO Y EXPULSION</b>                                                                 |                                                                                                                                                                                       |                                                                                                          |          |
| 356                                                                                                            | Después del nacimiento de su bebé, ¿el proveedor de salud le hizo un masaje firme en su abdomen bajo para ayudar a que su matriz se endureciera / contrajera?                         | ①. SÍ<br>②. NO<br>③. NO SABE/ NO SE ACUERDA                                                              |          |
| 357                                                                                                            | Después de la expulsión de la placenta, ¿el proveedor de salud le hizo un masaje firme en su vientre bajo para ayudar a que su matriz se endureciera / contrajera?                    | ①. SÍ<br>②. NO<br>③. NO SABE/ NO SE ACUERDA                                                              |          |
| <b>REVISAR LAS PREGUNTAS 301 y 302. SI LA RESPUESTA ES OBITO (BEBÉ NACIÓ MUERTO), SALTAR A LA PREGUNTA 371</b> |                                                                                                                                                                                       |                                                                                                          |          |
| 358                                                                                                            | ¿Le entregaron a su bebé de forma inmediata después del parto / a los pocos minutos del nacimiento?<br>► En caso de gemelos, referirse al 2 <sup>do</sup> gemelo                      | ①. SÍ<br>②. NO<br>③. NO SABE/ NO SE ACUERDA                                                              |          |
| 359                                                                                                            | ¿Secaron a su bebé con una toalla (o tela, campo) inmediatamente después del parto / a los pocos minutos del nacimiento?<br>► En caso de gemelos, referirse al 2 <sup>do</sup> gemelo | ①. SÍ<br>②. NO<br>③. NO SABE/ NO SE ACUERDA                                                              |          |
| 360                                                                                                            | ¿Inmediatamente después del nacimiento, le colocaron al bebé sobre su pecho, en contacto con su piel?<br>► En caso de gemelos, referirse al 2 <sup>do</sup> gemelo                    | ①. SÍ<br>②. NO<br>③. NO SABE/ NO SE ACUERDA                                                              | ④→363    |
| 361                                                                                                            | Mientras tenía al bebé sobre su pecho, ¿estaba envuelto en una tela o lo tenía desnudo contra su piel?                                                                                | ①. ENVUELTO EN LA TELA<br>②. BEBÉ DESNUDO EN CONTACTO CON LA PIEL DE LA MADRE<br>③. NO SABE/ NO RECUERDA | ④→363    |
| 362                                                                                                            | <i>(Si estaba desnudo contra su piel),</i> ¿Estaba el bebé cubierto con una toalla o tela mientras lo tenía sobre su pecho?                                                           | ①. SÍ<br>②. NO<br>③. NO SABE/ NO SE ACUERDA                                                              | ④→364    |
| 363                                                                                                            | ¿Su bebé fue envuelto en una toalla o tela inmediatamente después de nacido?                                                                                                          | ①. SÍ<br>②. NO<br>③. NO SABE/ NO SE ACUERDA                                                              |          |
| 364                                                                                                            | ¿Su bebé fue pesado inmediatamente después de nacido?<br>► En caso de gemelos, referirse al 2 <sup>do</sup> gemelo                                                                    | ①. SÍ<br>②. NO<br>③. NO SABE/ NO SE ACUERDA                                                              |          |
| 365                                                                                                            | ¿Cuánto pesó su bebé?<br>► En caso de gemelos, referirse al 2 <sup>do</sup> gemelo                                                                                                    | [ ][ ].[ ][ ][ ][ ]<br>PESO EN KILOGRAMOS<br>Ó<br>[ ][ ][ ][ ][ ]<br>PESO EN GRAMOS                      |          |

ANEXO II

CUESTIONARIO DE SALIDA A PACIENTES

| No.                                            | PREGUNTA/ ACCIÓN                                                                                                                                                                                                                                | CÓDIGO DE RESPUESTA                                                                                                             | SALTAR A |
|------------------------------------------------|-------------------------------------------------------------------------------------------------------------------------------------------------------------------------------------------------------------------------------------------------|---------------------------------------------------------------------------------------------------------------------------------|----------|
| <b>SECCIÓN 3: TRABAJO DE PARTO Y EXPULSION</b> |                                                                                                                                                                                                                                                 |                                                                                                                                 |          |
| 366                                            | <b>Indicar la fuente de informacion para la cifra del peso</b>                                                                                                                                                                                  | ①. PESO TOMADO DE LA CARTILLA DE SALUD Y/O EXPEDIENTE<br>②. PESO REPORTADO POR LA MADRE                                         |          |
| 367                                            | ¿Usted amamantó a su bebé?<br>► En caso de gemelos, referirse al 2 <sup>do</sup> gemelo                                                                                                                                                         | ①. SÍ<br>②. NO                                                                                                                  | ⑩→369    |
| 368                                            | ¿Usted amamantó a su bebé dentro de la primera hora después del parto?<br>► En caso de gemelos, referirse al 2 <sup>do</sup> gemelo                                                                                                             | ①. SÍ<br>②. NO<br>③. NO SABE/ NO RECUERDA                                                                                       |          |
| 369                                            | ¿Usted, o alguien más, le dio algo de comer o beber al bebé dentro de la primera hora después del parto?<br>► En caso de gemelos, referirse al 2 <sup>do</sup> gemelo<br>► Entrevistador(a): por favor contar líquidos aparte de leche materna. | ①. SÍ<br>②. NO<br>③. NO SABE/ NO RECUERDA                                                                                       |          |
| 370                                            | ¿Cuánto tiempo después de nacido se bañó al bebé por primera vez?<br>► En caso de gemelos, referirse al 2 <sup>do</sup> gemelo                                                                                                                  | ①. DENTRO DE LA PRIMERA HORA<br>②. 1-5 HORAS<br>③. 6-24 HORAS<br>④. 2-3 DÍAS<br>⑤. DESPUÉS DE 3 DÍAS<br>⑥. NO SABE/ NO RECUERDA |          |
| 371                                            | En la primera revisión que le hicieron después del parto, ¿el proveedor de salud buscó o le preguntó si estaba sangrando?                                                                                                                       | ①. SÍ<br>②. NO<br>③. NO SABE/ NO RECUERDA                                                                                       |          |
| 372                                            | ¿Le hicieron una transfusión de sangre en cualquier momento del parto o de su estancia en el hospital?                                                                                                                                          | ①. SÍ<br>②. NO<br>③. NO SABE/ NO RECUERDA                                                                                       |          |
| 373                                            | En la primera revisión que le hicieron después del parto, ¿el proveedor de salud le hizo una revisión perineal?<br>► Entrevistador(a): explique qué es revisión perineal                                                                        | ①. SÍ<br>②. NO<br>③. NO SABE/ NO SE ACUERDA                                                                                     |          |
| 374                                            | En la primera revisión que le hicieron después del parto, ¿algún proveedor de salud revisó su panza para saber si su matriz estaba firme/ se endureció?                                                                                         | ①. SÍ<br>②. NO<br>③. NO SABE/ NO SE ACUERDA                                                                                     |          |
| 375                                            | En la primera revisión que le hicieron después del parto, ¿algún proveedor de salud le tomó la presión?                                                                                                                                         | ①. SÍ<br>②. NO<br>③. NO SABE/ NO SE ACUERDA                                                                                     |          |
| 376                                            | En la primera revisión que le hicieron después del parto, ¿algún proveedor de salud le tomó la temperatura?                                                                                                                                     | ①. SÍ<br>②. NO<br>③. NO SABE/ NO SE ACUERDA                                                                                     |          |
