# Supplementary material for: Measuring progress in maternal and newborn health care in Mexico: validating indicators of health system contact and quality of care
Source: Springer Nature journal article supplement (doi:10.1186/s12884-016-1047-0), 2016-08-30
Supplement: MOESM3 [file 10632606]

## LABOR AND DELIVERY OBSERVATION CHECKLIST

### Validating indicators of the quality of maternal health care

**OBSERVER:** BEFORE BEGINNING OBSERVATION, INTRODUCE YOURSELF AND OBTAIN PERMISSION FROM BOTH THE SERVICE PROVIDER AND CLIENT. MAKE SURE THAT THE PROVIDER KNOWS THAT YOU ARE NOT THERE TO EVALUATE HIM OR HER, AND THAT YOU ARE NOT AN 'EXPERT' TO BE CONSULTED DURING THE SESSION.

| #                                         | Question                                                              | Response codes                                                                               | SKIP TO                  |
|-------------------------------------------|-----------------------------------------------------------------------|----------------------------------------------------------------------------------------------|--------------------------|
| <b>SECTION 1: COVER SHEET INFORMATION</b> |                                                                       |                                                                                              |                          |
| 101.                                      | OBSERVER NAME                                                         | _____                                                                                        |                          |
| 102.                                      | OBSERVER CODE                                                         | _ _ _ _                                                                                      |                          |
| 103.                                      | FACILITY Name                                                         | _____                                                                                        |                          |
| 104.                                      | FACILITY CODE                                                         | _ _ _ _                                                                                      |                          |
| 105.                                      | CLIENT ID                                                             | _ _ _ _ _ _ _ _ _ _ _ _ _ _ _ _                                                              |                          |
| 106.                                      | DATE OF OBSERVATION                                                   | _ _ _ _ _ _ _ _ _ _ _ _ _ _ _ _ <br>D D M M Y Y                                              |                          |
| 107.                                      | TIME OF DAY DELIVERY CONDUCTED                                        | DAY..... 1<br>NIGHT..... 2                                                                   |                          |
| 108.                                      | OUTCOME OF OBSERVATION<br><br><b>COMPLETE AT END OF OBSERVATION</b>   | COMPLETED ..... 1<br>PARTIALLY COMPLETED ..... 2<br>REFUSED ..... 3<br>OTHER..... 8          | END<br>END<br>END<br>END |
| 109.                                      | LANGUAGE(S) USED [BETWEEN PROVIDER AND CLIENT] TO CONDUCT OBSERVATION | ENGLISH ..... 1<br>SPANISH / KISWAHILI..... 2<br>LOCAL LANGUAGE..... 3<br>(SPECIFY)<br>_____ |                          |

| #    | Question                                            | Response codes                      | SKIP TO |
|------|-----------------------------------------------------|-------------------------------------|---------|
| 110. | TIME OBSERVATION BEGINS:<br>(USE THE 24-HOUR CLOCK) | HOURS  __ __ <br><br>MINUTES  __ __ |         |

| #                                                                                                                                                                                 | Question/Task                                                                    | Response codes                      | SKIP TO |
|-----------------------------------------------------------------------------------------------------------------------------------------------------------------------------------|----------------------------------------------------------------------------------|-------------------------------------|---------|
| <b>SECTION 2: OBSERVATION OF INITIAL CLIENT ASSESSMENT</b>                                                                                                                        |                                                                                  |                                     |         |
| <i>RECORD WHETHER THE PROVIDER CARRIED OUT THE FOLLOWING STEPS AND/OR EXAMINATIONS (SOME OF THE FOLLOWING STEPS MAY BE PERFORMED SIMULTANEOUSLY OR BY MORE THAN ONE PROVIDER)</i> |                                                                                  |                                     |         |
| 200.                                                                                                                                                                              | WAS THIS SECTION OBSERVED                                                        | YES .....1<br>NO.....2              | 300     |
| 201.                                                                                                                                                                              | Record age of woman                                                              | __ __                               |         |
| 202.                                                                                                                                                                              | Record parity of the woman <u>prior</u> to this delivery                         | __ __                               |         |
| 203.                                                                                                                                                                              | Was woman referred from another facility?                                        | YES .....1<br>NO.....2<br>DK.....8  |         |
| 204.                                                                                                                                                                              | Time of admission to labor ward (use 24 hour clock)                              | HOURS  __ __ <br><br>MINUTES  __ __ |         |
| 205.                                                                                                                                                                              | Encourages the woman to have a support person present throughout labor and birth | YES .....1<br>NO.....2<br>DK.....8  |         |
| 206.                                                                                                                                                                              | Checks woman's HIV status (checks chart or asks woman)?                          | YES .....1<br>NO.....2<br>DK.....8  |         |
| 207.                                                                                                                                                                              | Offers woman HIV test                                                            | YES .....1<br>NO.....2<br>DK.....8  |         |
| 208.                                                                                                                                                                              | Gives woman HIV test                                                             | YES .....1<br>NO.....2<br>DK.....8  |         |

| #    | Question/Task                                                                              | Response codes                     | SKIP TO |
|------|--------------------------------------------------------------------------------------------|------------------------------------|---------|
| 209. | Washes his/her hands with soap and water or uses antiseptic before any initial examination | YES .....1<br>NO.....2<br>DK.....8 |         |
| 210. | Explains procedures to woman (support person) before proceeding                            | YES .....1<br>NO.....2<br>DK.....8 |         |
| 211. | Takes temperature                                                                          | YES .....1<br>NO.....2<br>DK.....8 |         |
| 212. | Takes pulse                                                                                | YES .....1<br>NO.....2<br>DK.....8 |         |
| 213. | Takes blood pressure                                                                       | YES .....1<br>NO.....2<br>DK.....8 |         |
| 214. | Takes urine sample to test for presence of protein                                         | YES .....1<br>NO.....2<br>DK.....8 |         |
| 215. | Abdominal examination - Checks fetal heart rates with fetoscope/doppler/ultrasound         | YES .....1<br>NO.....2<br>DK.....8 |         |
| 216. | Performs vaginal examination                                                               | YES .....1<br>NO.....2<br>DK.....8 |         |
| 217. | Wears high-level disinfected or sterile gloves for vaginal examination                     | YES .....1<br>NO.....2<br>DK.....8 |         |

| #                                                                                                                                                                                 | Question/Task                                                                          | Response codes                     | SKIP TO    |
|-----------------------------------------------------------------------------------------------------------------------------------------------------------------------------------|----------------------------------------------------------------------------------------|------------------------------------|------------|
| <b>SECTION 3: OBSERVATION OF 1st STAGE OF LABOUR</b>                                                                                                                              |                                                                                        |                                    |            |
| <i>RECORD WHETHER THE PROVIDER CARRIED OUT THE FOLLOWING STEPS AND/OR EXAMINATIONS (SOME OF THE FOLLOWING STEPS MAY BE PERFORMED SIMULTANEOUSLY OR BY MORE THAN ONE PROVIDER)</i> |                                                                                        |                                    |            |
| 300.                                                                                                                                                                              | WAS THIS SECTION OBSERVED                                                              | YES .....1<br>NO.....2             | 400        |
| 301.                                                                                                                                                                              | Induces labor with uterotonic                                                          | YES .....1<br>NO.....2<br>DK.....8 | 303<br>303 |
| 302.                                                                                                                                                                              | Route of administration of uterotonic                                                  | IV.....1<br>IM.....2               |            |
| 303.                                                                                                                                                                              | Augments labor with uterotonic                                                         | YES .....1<br>NO.....2<br>DK.....8 | 305<br>305 |
| 304.                                                                                                                                                                              | Route of administration of uterotonic                                                  | IV.....1<br>IM.....2               |            |
| 305.                                                                                                                                                                              | Performs artificial rupture of the membranes                                           | YES .....1<br>NO.....2<br>DK.....8 |            |
| 306.                                                                                                                                                                              | At least once, encourages/assists the woman to ambulate during labor                   | YES .....1<br>NO.....2<br>DK.....8 |            |
| 307.                                                                                                                                                                              | At least once, encourages/assists the woman to assume different positions during labor | YES .....1<br>NO.....2<br>DK.....8 |            |
| 308.                                                                                                                                                                              | At least once, encourages/assists the woman to drink liquids or eat                    | YES .....1<br>NO.....2<br>DK.....8 |            |
| 309.                                                                                                                                                                              | Encourages the woman to have a support person present throughout labor and birth       | YES .....1<br>NO.....2<br>DK.....8 |            |

| #    | Question/Task                                                                               | Response codes                                                                                                                                                                                        | SKIP TO |
|------|---------------------------------------------------------------------------------------------|-------------------------------------------------------------------------------------------------------------------------------------------------------------------------------------------------------|---------|
| 310. | A support person is present at some point during labor                                      | YES .....1<br>NO.....2<br>DK.....8                                                                                                                                                                    |         |
| 311. | Washes his/her hands with soap and water or uses antiseptic before examination of the woman | YES .....1<br>NO.....2<br>DK.....8                                                                                                                                                                    |         |
| 312. | Wears high-level disinfected or sterile gloves                                              | YES .....1<br>NO.....2<br>DK.....8                                                                                                                                                                    |         |
| 313. | Who was the main provider(s) who assisted with the woman's labor?<br><br>LIST ALL PROVIDERS | DOCTOR (OBGYN).....1<br>MEDICAL RESIDENT .....2<br>MEDICAL INTERN.....3<br>NURSE.....4<br>MIDWIFE.....5<br>CLINICAL OFFICER .....6<br>SUPPORT STAFF/AIDE.....7<br>OTHER .....8<br>(SPECIFY)<br>_____  |         |
| 314. | Did other provider(s) assist with the woman's labor?<br><br>LIST ALL PROVIDERS              | DOCTOR (OBGYN) .....1<br>MEDICAL RESIDENT .....2<br>MEDICAL INTERN.....3<br>NURSE.....4<br>MIDWIFE.....5<br>CLINICAL OFFICER .....6<br>SUPPORT STAFF/AIDE.....7<br>OTHER .....8<br>(SPECIFY)<br>_____ |         |
| 315. | How many providers in total assisted with the woman's labor?                                | __ __                                                                                                                                                                                                 |         |

| #                                                                                                                                                                                 | Question/Task                                                       | Response codes                             | SKIP TO    |
|-----------------------------------------------------------------------------------------------------------------------------------------------------------------------------------|---------------------------------------------------------------------|--------------------------------------------|------------|
| <b>SECTION 4: CONTINUOUS OBSERVATION OF SECOND &amp; THIRD STAGE OF LABOR</b>                                                                                                     |                                                                     |                                            |            |
| <i>RECORD WHETHER THE PROVIDER CARRIED OUT THE FOLLOWING STEPS AND/OR EXAMINATIONS (SOME OF THE FOLLOWING STEPS MAY BE PERFORMED SIMULTANEOUSLY OR BY MORE THAN ONE PROVIDER)</i> |                                                                     |                                            |            |
| 400.                                                                                                                                                                              | WAS THIS SECTION OBSERVED                                           | YES .....1<br>NO.....2                     | 500        |
| 401.                                                                                                                                                                              | Was an episiotomy done?                                             | YES .....1<br>NO.....2<br>DK.....8         |            |
| 402.                                                                                                                                                                              | OBSERVER: Note time of the delivery of the baby (use 24 hour clock) | HOURS  __ __ <br>MINUTES  __ __            |            |
| 403.                                                                                                                                                                              | Second baby present                                                 | YES (twin) .....1<br>NO (singleton) .....2 |            |
| 404.                                                                                                                                                                              | Birthweight (in grams); enter 9999 if not available                 | __ __  __ __                               |            |
| 405.                                                                                                                                                                              | Uterotonic administered                                             | YES .....1<br>NO.....2<br>DK.....8         | 411<br>411 |
| 406.                                                                                                                                                                              | OBSERVER: Note time uterotonic given (use 24 hour clock)            | HOURS  __ __ <br>MINUTES  __ __            |            |

| #    | Question/Task                                                                                                                                                                                                                                                                                                                              | Response codes                                                                                                                                              | SKIP TO |
|------|--------------------------------------------------------------------------------------------------------------------------------------------------------------------------------------------------------------------------------------------------------------------------------------------------------------------------------------------|-------------------------------------------------------------------------------------------------------------------------------------------------------------|---------|
| 407. | Timing of administration of uterotonic:<br>a. at delivery of the anterior shoulder<br>b. within 1 minute of delivery of baby<br>c. within 3 minutes of delivery of baby<br>d. more than 3 minutes of delivery of baby AND BEFORE delivery of the placenta<br>e. more than 3 minutes of delivery of baby AND AFTER delivery of the placenta | ANT SHLDR ..... 1<br>1 MIN AFTER DELIVERY ..... 2<br>3 MINS AFTER DELIVERY ..... 3<br>+3 BEFORE PLACENTA..... 4<br>+3 AFTER PLACENTA..... 5<br>DK..... 8    |         |
| 408. | Which uterotonic given:<br>a. Oxytocin<br>b. Ergometrine<br>c. Syntometrine<br>d. Prostaglandins                                                                                                                                                                                                                                           | OXYTOCIN..... 1<br>ERGOMETRINE ..... 2<br>SYNTOMETRINE..... 3<br>PROSTAGLANDIN..... 4<br>DK..... 8                                                          |         |
| 409. | Dose of uterotonic given and type of units of medication (e.g. IU, mg)<br><br>(IF NECESSARY, ASK/CHECK AFTERWARDS)                                                                                                                                                                                                                         | D) DOSE         __ __ <br><br>U) UNITS<br>IU ..... 1<br>mg..... 2<br>ml..... 3<br>mcg..... 4                                                                |         |
| 410. | Route uterotonic given                                                                                                                                                                                                                                                                                                                     | IM..... 1<br>IV push (bolus)..... 2<br>IV drip ..... 3<br>IV drip plus IM..... 4<br>Oral ..... 5<br>Vaginal ..... 6<br>Sublingual ..... 7<br>Rectal ..... 8 |         |
| 411. | OBSERVER: Note time the cord was clamped (use 24-hour clock)                                                                                                                                                                                                                                                                               | HOURS  __ __ <br><br>MINUTES  __ __                                                                                                                         |         |

| #    | Question/Task                                                                          | Response codes                                                                                                                                                                                        | SKIP TO |
|------|----------------------------------------------------------------------------------------|-------------------------------------------------------------------------------------------------------------------------------------------------------------------------------------------------------|---------|
| 412. | Applies traction to cord while applying suprapubic counter traction                    | YES .....1<br>NO.....2<br>DK.....8                                                                                                                                                                    |         |
| 413. | Performs uterine massage immediately following delivery                                | YES .....1<br>NO.....2<br>DK.....8                                                                                                                                                                    |         |
| 414. | Assesses completeness of the placenta and membranes                                    | YES .....1<br>NO.....2<br>DK.....8                                                                                                                                                                    |         |
| 415. | Assesses for perineal and vaginal lacerations                                          | YES .....1<br>NO.....2<br>DK.....8                                                                                                                                                                    |         |
| 416. | Did more than one health worker assist with the birth?                                 | YES .....1<br>NO.....2                                                                                                                                                                                |         |
| 417. | Who was the main provider(s) who assisted with the delivery?<br><br>LIST ALL PROVIDERS | DOCTOR (OBGYN) .....1<br>MEDICAL RESIDENT .....2<br>MEDICAL INTERN.....3<br>NURSE.....4<br>MIDWIFE.....5<br>CLINICAL OFFICER .....6<br>SUPPORT STAFF/AIDE.....7<br>OTHER .....8<br>(SPECIFY)<br>_____ |         |
| 418. | Did other provider(s) assist with the delivery?<br><br>LIST ALL PROVIDERS              | DOCTOR (OBGYN) .....1<br>MEDICAL RESIDENT .....2<br>MEDICAL INTERN.....3<br>NURSE.....4<br>MIDWIFE.....5<br>CLINICAL OFFICER .....6<br>SUPPORT STAFF/AIDE.....7<br>OTHER .....8<br>(SPECIFY)<br>_____ |         |



| #    | Question/Task                                                   | Response codes                                                                                                                                                           | SKIP TO |
|------|-----------------------------------------------------------------|--------------------------------------------------------------------------------------------------------------------------------------------------------------------------|---------|
| 419. | How many providers in total assisted with the woman's delivery? | __ __                                                                                                                                                                    |         |
| 420. | What was the position of the mother at birth?                   | ON BACK .....1<br>(LITHOTOMY)<br>UPRIGHT HALF-SITTING.....2<br>LEFT LATERAL.....3<br>ON HANDS AND KNEES .....4<br>SQUATTING .....5<br>OTHER .....8<br>(SPECIFY)<br>_____ |         |

| #                                                                                                                                                                                 | Question/Task                                                                                        | Response codes                     | SKIP TO |
|-----------------------------------------------------------------------------------------------------------------------------------------------------------------------------------|------------------------------------------------------------------------------------------------------|------------------------------------|---------|
| <b>SECTION 5: OBSERVATION OF IMMEDIATE NEWBORN, POSTNATAL AND POSTPARTUM CARE</b>                                                                                                 |                                                                                                      |                                    |         |
| <i>RECORD WHETHER THE PROVIDER CARRIED OUT THE FOLLOWING STEPS AND/OR EXAMINATIONS (SOME OF THE FOLLOWING STEPS MAY BE PERFORMED SIMULTANEOUSLY OR BY MORE THAN ONE PROVIDER)</i> |                                                                                                      |                                    |         |
| 500.                                                                                                                                                                              | WAS THIS SECTION OBSERVED                                                                            | YES .....1<br>NO.....2             | 600     |
| 501.                                                                                                                                                                              | A support person (companion) for mother is present during the birth                                  | YES .....1<br>NO.....2<br>DK.....8 |         |
| 502.                                                                                                                                                                              | Immediately dries baby with towel /cloth                                                             | YES .....1<br>NO.....2<br>DK.....8 |         |
| 503.                                                                                                                                                                              | Is the baby breathing /crying?                                                                       | YES .....1<br>NO.....2             | 514     |
| 504.                                                                                                                                                                              | Baby given to mother immediately, within a few minutes, after birth?                                 | YES .....1<br>NO.....2<br>DK.....8 |         |
| 505.                                                                                                                                                                              | Places newborn on the mother's abdomen "skin to skin"                                                | YES .....1<br>NO.....2<br>DK.....8 | 507     |
| 506.                                                                                                                                                                              | Covers baby with dry towel                                                                           | YES .....1<br>NO.....2<br>DK.....8 |         |
| 507.                                                                                                                                                                              | If not placed skin to skin, wraps baby in dry towel                                                  | YES .....1<br>NO.....2<br>DK.....8 |         |
| 508.                                                                                                                                                                              | Ties or clamps cord when pulsations stop or by 2-3 minutes after birth (not immediately after birth) | YES .....1<br>NO.....2<br>DK.....8 |         |

| #    | Question/Task                                                                                                                                                 | Response codes                     | SKIP TO |
|------|---------------------------------------------------------------------------------------------------------------------------------------------------------------|------------------------------------|---------|
| 509. | Cuts cord, using clean blade or clean scissors                                                                                                                | YES .....1<br>NO.....2<br>DK.....8 |         |
| 510. | Breastfeeding initiated within the first hour after birth                                                                                                     | YES .....1<br>NO.....2<br>DK.....8 |         |
| 511. | Was anything besides breastmilk given to the baby to drink within the first hour after birth?                                                                 | YES .....1<br>NO.....2<br>DK.....8 |         |
| 512. | Baby bathed within the first hour after birth                                                                                                                 | YES .....1<br>NO.....2<br>DK.....8 |         |
| 513. | Baby kept skin to skin with mother for first hour after birth                                                                                                 | YES .....1<br>NO.....2<br>DK.....8 |         |
| 514. | Takes mother's vital signs 15 minutes after birth                                                                                                             | YES .....1<br>NO.....2<br>DK.....8 |         |
| 515. | Palpates uterus 15 minutes after delivery of placenta                                                                                                         | YES .....1<br>NO.....2<br>DK.....8 |         |
| 516. | In first physical examination after delivery – <i>during or after the 4<sup>th</sup> stage of labor</i> – did health provider look for or ask about bleeding? | YES .....1<br>NO.....2<br>DK.....8 |         |
| 517. | In first physical examination after delivery – <i>during or after the 4<sup>th</sup> stage of labor</i> – did health provider examine the perineum?           | YES .....1<br>NO.....2<br>DK.....8 |         |
| 518. | In first physical examination after delivery – <i>during or after the 4<sup>th</sup> stage of labor</i> – did health provider take the woman's temperature?   | YES .....1<br>NO.....2<br>DK.....8 |         |

| #    | Question/Task                                                                                                                                                  | Response codes                      | SKIP TO |
|------|----------------------------------------------------------------------------------------------------------------------------------------------------------------|-------------------------------------|---------|
| 519. | In first physical examination after delivery – <i>during or after the 4<sup>th</sup> stage of labor</i> – did health provider take the woman’s blood pressure? | YES .....1<br>NO.....2<br>DK.....8  |         |
| 520. | In first physical examination after delivery – <i>during or after the 4<sup>th</sup> stage of labor</i> – did health provider check for involution?            | YES .....1<br>NO.....2<br>DK.....8  |         |
| 521. | Time of first physical examination of the mother after delivery (use 24 hour clock)                                                                            | HOURS  __ __ <br><br>MINUTES  __ __ |         |
| 522. | Time of admission to post-labor ward (use 24 hour clock)                                                                                                       | HOURS  __ __ <br><br>MINUTES  __ __ |         |

| #                                                                   | Question/Task                                                                                                                                                                                                                                              | Response codes                                                                                                                                                                         | SKIP TO |
|---------------------------------------------------------------------|------------------------------------------------------------------------------------------------------------------------------------------------------------------------------------------------------------------------------------------------------------|----------------------------------------------------------------------------------------------------------------------------------------------------------------------------------------|---------|
| <b>SECTION 6: REVIEW OF L&amp;D OBSERVATION</b>                     |                                                                                                                                                                                                                                                            |                                                                                                                                                                                        |         |
| IF NECESSARY, CHECK MEDICAL RECORDS/ ASK PROVIDER AFTER OBSERVATION |                                                                                                                                                                                                                                                            |                                                                                                                                                                                        |         |
| 600.                                                                | Did the provider complete maternity register/birth log                                                                                                                                                                                                     | YES.....1<br>NO.....2<br>DK.....8                                                                                                                                                      |         |
| 601.                                                                | Did the provider use a partograph                                                                                                                                                                                                                          | YES.....1<br>NO.....2<br>DK.....8                                                                                                                                                      | 603     |
| 602.                                                                | Partograph not used because woman arrived in second stage of labor                                                                                                                                                                                         | YES.....1<br>NO.....2<br>DK.....8                                                                                                                                                      |         |
| 603.                                                                | OBSERVER: did you see provider fill out partograph after delivery (with information that should be entered during labor)                                                                                                                                   | YES.....1<br>NO.....2<br>DK.....8                                                                                                                                                      |         |
| 604.                                                                | Record the condition/outcome for the mother<br>a. Goes to recuperation ward<br>b. Referred to specialist in same facility<br>c. Goes to surgery in same facility<br>d. Referred to other facility<br>e. Death of mother                                    | RECUP WARD .....1<br>REFER, SAME FACILITY.....2<br>SURGERY.....3<br>REFER, OTHER FACILITY.....4<br>DEATH.....5                                                                         |         |
| 605.                                                                | Record the condition/outcome for the baby<br>a. Goes to normal nursery<br>b. Referred to specialist in same facility<br>c. Referred to other facility<br>d. Goes to ward with mother<br>e. Newborn death<br>f. Fresh stillbirth<br>g. Macerated stillbirth | NURSERY.....1<br>REFER, SAME FACILITY.....2<br>REFER, OTHER FACILITY.....3<br>WARD WITH MOTHER .....4<br>NEWBORN DEATH.....5<br>FRESH STILLBIRTH .....6<br>MACERATED STILLBIRTH .....7 |         |

| #    | Question/Task                                                                                     | Response codes                                                                                                                                                                                                                                   | SKIP TO                  |
|------|---------------------------------------------------------------------------------------------------|--------------------------------------------------------------------------------------------------------------------------------------------------------------------------------------------------------------------------------------------------|--------------------------|
| 606. | Record the type of delivery                                                                       | VAGINAL .....1<br>ASSISTED, FORCEPS .....2<br>ASSISTED, VENTOUSE .....3<br>CESAREAN .....4<br>DK.....8                                                                                                                                           | 611<br>611<br>611<br>611 |
| 607. | Was cesarean operation performed before woman went into labor or after labor had already started? | BEFORE LABOR STARTED ....1<br>AFTER LABOR STARTED .....2<br>DON'T KNOW.....8                                                                                                                                                                     |                          |
| 608. | What was the indication for the cesarean operation?                                               | Excessive bleeding .....1<br>Obstructed labor .....2<br>Prolonged labor.....3<br>Uterine rupture .....4<br>Malpresentation .....5<br>Fetal distress .....6<br>OTHER .....7<br>(SPECIFY)<br>_____<br>No medical reason.....8<br>Don't know .....9 |                          |
| 609. | When was the decision for the cesarean taken?                                                     | BEFORE LABOR STARTED ....1<br>AFTER LABOR STARTED .....2<br>DON'T KNOW.....8                                                                                                                                                                     |                          |
| 610. | Who decided cesarean would be done?                                                               | DOCTOR/PROVIDER .....1<br>WOMAN .....2<br>DON'T KNOW.....8                                                                                                                                                                                       |                          |

| #    | Question/Task                                                                                                                                                                                          | Response codes                                                                                                                                                                                               | SKIP TO |
|------|--------------------------------------------------------------------------------------------------------------------------------------------------------------------------------------------------------|--------------------------------------------------------------------------------------------------------------------------------------------------------------------------------------------------------------|---------|
| 611. | Record if mother had any of the following complications:<br><br>a. Preeclampsia/Elampsia<br>b. Hemorrhage<br>c. Obstructed labor<br>d. Prolonged labor<br>e. Uterine rupture<br>f. Puerperal infection | PE/E.....1<br>HEMORRHAGE .....2<br>OBSTRUCTED LABOR.....3<br>PROLONGED LABOR .....4<br>UTERINE RUPTURE .....5<br>SEPSIS .....6<br>OTHER .....7<br>(SPECIFY)<br>_____<br>NO COMPLICATIONS .....8<br>DK .....9 |         |
| 612. | At what stage of labor and delivery did the complication occur?                                                                                                                                        | BEFORE DELIVERY .....1<br>AT DELIVERY .....2<br>POST PARTUM.....3<br>DK .....8                                                                                                                               |         |
| 613. | Were any blood products given to the women due to excessive blood loss during labor, delivery or immediate postpartum?                                                                                 | YES.....1<br>NO .....2<br>DK .....8                                                                                                                                                                          |         |
| 614. | Did the woman ask for any pain relief medication during labor, delivery or immediate postpartum?                                                                                                       | YES.....1<br>NO .....2<br>DK .....8                                                                                                                                                                          |         |
| 615. | Was the woman given any pain relief medication during labor, delivery or immediate postpartum?                                                                                                         | YES.....1<br>NO .....2<br>DK .....8                                                                                                                                                                          |         |
| 616. | Was the woman given any antibiotics during labor, delivery or immediate postpartum?                                                                                                                    | YES.....1<br>NO .....2<br>DK .....8                                                                                                                                                                          |         |
| 617. | Time L&D observation ended (use 24-hour clock)                                                                                                                                                         | HOURS  __ __ <br><br>MINUTES  __ __                                                                                                                                                                          |         |
