# Supplementary material for: Measuring progress in maternal and newborn health care in Mexico: validating indicators of health system contact and quality of care
Source: Springer Nature journal article supplement (doi:10.1186/s12884-016-1047-0), 2016-08-30
Supplement: MOESM4 [file 10632606]

ANEXO I

LISTA DE OBSERVACIONES DE TRABAJO DE PARTO Y EXPULSIÓN

△ **OBSERVADOR(A):** PRESÉNTESE Y OBTENGA PERMISO DEL PROVEEDOR DE SALUD Y DE LA PACIENTE ANTES DE INICIAR LA OBSERVACIÓN. ASEGÚRESE DE QUE EL PROVEEDOR SEPA QUE NO LO(A) ESTA EVALUANDO Y QUE USTED NO ES UN “EXPERTO” A QUIÉN PUEDA CONSULTAR DURANTE LA SESION

| No.                                          | PREGUNTA                                      | CÓDIGO DE RESPUESTA                             | PATRÓN DE SALTO |
|----------------------------------------------|-----------------------------------------------|-------------------------------------------------|-----------------|
| <b>SECCIÓN 1: INFORMACIÓN DE LA CARÁTULA</b> |                                               |                                                 |                 |
| 101                                          | NOMBRE DEL (DE LA) OBSERVADOR(A)              |                                                 |                 |
| 102                                          | CÓDIGO DEL (DE LA) OBSERVADOR(A)              | [ ] [ ] [ ]                                     |                 |
| 103                                          | NOMBRE DEL HOSPITAL                           |                                                 |                 |
| 104                                          | CÓDIGO DEL HOSPITAL                           | [ ] [ ] [ ]                                     |                 |
| 105                                          | IDENTIFICACIÓN DE LA PACIENTE                 | [ ] [ ] [ ] [ ] [ ] [ ] [ ] [ ] [ ] [ ] [ ] [ ] |                 |
| 106                                          | FECHA DE LA OBSERVACIÓN                       | [ ] [ ] [ ] [ ] [ ] [ ] DD MM AA                |                 |
| 107                                          | HORA DEL DÍA EN LA CUAL OCURRIÓ EL PARTO      | ①. MATUTINO<br>②. VESPERTINO<br>③. NOCTURNO     |                 |
| 108                                          | RESULTADO DE LA OBSERVACIÓN                   | ①. COMPLETADA                                   | →FIN            |
|                                              | ▶ COMPLETAR UNA VEZ FINALIZADA LA OBSERVACIÓN | ②. PARCIALMENTE COMPLETADA                      | →FIN            |
| ③. RECHAZADA                                 |                                               | →FIN                                            |                 |
| ④. OTRA                                      |                                               | →FIN                                            |                 |
| 109                                          | HORA EN LA QUE INICIA LA OBSERVACIÓN          | HORAS [ ] [ ]                                   |                 |
|                                              | ▶ UTILICE EL RELOJ DE 24 HORAS                | MINUTOS [ ] [ ]                                 |                 |

TdP: Trabajo de parto

ANEXO I

LISTA DE OBSERVACIONES DE TRABAJO DE PARTO Y EXPULSIÓN

| No.                                                                   | PREGUNTA/ ACCIÓN                                                                                                                                            | CÓDIGO DE RESPUESTA                                        | SALTAR A |
|-----------------------------------------------------------------------|-------------------------------------------------------------------------------------------------------------------------------------------------------------|------------------------------------------------------------|----------|
| <b>SECCIÓN 2: OBSERVACIÓN DE LA EVALUACION INICIAL DE LA PACIENTE</b> |                                                                                                                                                             |                                                            |          |
| △                                                                     | REGISTRE SI EL PROVEEDOR DE SALUD REALIZÓ LAS SIGUIENTES ACCIONES Y/O EXÁMENES<br>(ALGUNOS PUEDEN REALIZARSE DE FORMA SIMULTÁNEA O POR MÁS DE UN PROVEEDOR) |                                                            |          |
| 200                                                                   | ¿SE OBSERVÓ ESTA SECCIÓN?                                                                                                                                   | ①.SÍ ②.NO                                                  | ②→300    |
| 201                                                                   | Registre la edad de la mujer                                                                                                                                | <input type="text"/>                                       |          |
| 202                                                                   | Registre la paridad de la mujer, <b>previo</b> a este parto                                                                                                 | <input type="text"/>                                       |          |
| 203                                                                   | ¿La mujer ha sido referida de otra institución de salud?                                                                                                    | ①.SÍ ②.NO ⑧.NO SABE                                        |          |
| 204                                                                   | HORA DE ADMISIÓN A LA SALA DE PARTO<br>► Utilice el reloj de 24 horas                                                                                       | HORAS <input type="text"/><br>MINUTOS <input type="text"/> |          |
| 205                                                                   | ¿Se alienta a la mujer para que tenga un acompañante presente a lo largo del trabajo de parto y expulsión?                                                  | ①.SÍ ②.NO ⑧.NO SABE                                        |          |
| 206                                                                   | ¿Se revisa si la mujer tiene VIH (revisa el expediente clínico o se le pregunta a la mujer)?                                                                | ①.SÍ ②.NO ⑧.NO SABE                                        |          |
| 207                                                                   | ¿Se ofrece a la mujer una prueba de VIH?                                                                                                                    | ①.SÍ ②.NO ⑧.NO SABE                                        |          |
| 208                                                                   | ¿Se realiza una prueba de VIH?                                                                                                                              | ①.SÍ ②.NO ⑧.NO SABE                                        |          |
| 209                                                                   | ¿Se lava las manos con agua y jabón o utiliza un antiséptico antes de cada exploración a la mujer?                                                          | ①.SÍ ②.NO ⑧.NO SABE                                        |          |
| 210                                                                   | ¿Se explican los procedimientos a la mujer (acompañante) antes de realizarlos?                                                                              | ①.SÍ ②.NO ⑧.NO SABE                                        |          |
| 211                                                                   | ¿Se toma la temperatura?                                                                                                                                    | ①.SÍ ②.NO ⑧.NO SABE                                        |          |
| 212                                                                   | ¿Se toma el pulso?                                                                                                                                          | ①.SÍ ②.NO ⑧.NO SABE                                        |          |
| 213                                                                   | ¿Se toma la tensión arterial?                                                                                                                               | ①.SÍ ②.NO ⑧.NO SABE                                        |          |
| 214                                                                   | ¿Se toma muestra de orina para evaluar presencia de proteínas?                                                                                              | ①.SÍ ②.NO ⑧.NO SABE                                        |          |
| 215                                                                   | Exploración abdominal –<br>¿Se toma la frecuencia cardiaca fetal con fetoscopio/ doppler/ ultrasonido?                                                      | ①.SÍ ②.NO ⑧.NO SABE                                        |          |
| 216                                                                   | ¿Se realiza tacto vaginal?                                                                                                                                  | ①.SÍ ②.NO ⑧.NO SABE                                        | ②→300    |
| 217                                                                   | ¿Utiliza guantes desinfectados o estériles para realizar el tacto vaginal?                                                                                  | ①.SÍ ②.NO ⑧.NO SABE                                        |          |

ANEXO I

LISTA DE OBSERVACIONES DE TRABAJO DE PARTO Y EXPULSIÓN

| No.                                                                    | PREGUNTA/ ACCIÓN                                                                                                                                                                   | CÓDIGO DE RESPUESTA                                                                                                                                                                                                                  | SALTAR A       |
|------------------------------------------------------------------------|------------------------------------------------------------------------------------------------------------------------------------------------------------------------------------|--------------------------------------------------------------------------------------------------------------------------------------------------------------------------------------------------------------------------------------|----------------|
| <b>SECCIÓN 3: OBSERVACIÓN DE LA PRIMERA ETAPA DEL TRABAJO DE PARTO</b> |                                                                                                                                                                                    |                                                                                                                                                                                                                                      |                |
| △                                                                      | REGISTRE SI EL PROVEEDOR DE SALUD REALIZÓ LAS SIGUIENTES ACCIONES Y/O EXÁMENES (ALGUNOS PUEDEN REALIZARSE DE FORMA SIMULTÁNEA O POR MÁS DE UN PROVEEDOR)                           |                                                                                                                                                                                                                                      |                |
| 300                                                                    | ¿SE OBSERVÓ ESTA SECCIÓN?                                                                                                                                                          | ①. SÍ ②. NO                                                                                                                                                                                                                          | ②→400          |
| 301                                                                    | Se induce el trabajo de parto con un uterotónico?                                                                                                                                  | ①. SÍ ②. NO ⑧. NO SABE                                                                                                                                                                                                               | ②→303<br>⑧→303 |
| 302                                                                    | Vía de administración del uterotónico                                                                                                                                              | ①. IV ②. IM                                                                                                                                                                                                                          |                |
| 303                                                                    | ¿El trabajo de parto se lleva a cabo con un uterotónico?                                                                                                                           | ①. SÍ ②. NO ⑧. NO SABE                                                                                                                                                                                                               | ②→305<br>⑧→305 |
| 304                                                                    | Vía de administración del uterotónico                                                                                                                                              | ①. IV ②. IM                                                                                                                                                                                                                          |                |
| 305                                                                    | ¿Se lleva a cabo la rotura artificial de membranas? (Amniotomía)                                                                                                                   | ①.SÍ ②.NO ⑧.NO SABE                                                                                                                                                                                                                  |                |
| 306                                                                    | Alienta / ayuda a la mujer a caminar durante el trabajo de parto, al menos en una ocasión                                                                                          | ①.SÍ ②.NO ⑧.NO SABE                                                                                                                                                                                                                  |                |
| 307                                                                    | Alienta / ayuda a la mujer a adoptar diferentes posiciones durante el trabajo de parto, al menos en una ocasión                                                                    | ①.SÍ ②.NO ⑧.NO SABE                                                                                                                                                                                                                  |                |
| 308                                                                    | Alienta / ayuda a la mujer a beber líquidos o comer, al menos en una ocasión                                                                                                       | ①.SÍ ②.NO ⑧.NO SABE                                                                                                                                                                                                                  |                |
| 309                                                                    | Alienta a la mujer para que tenga un acompañante presente a lo largo del trabajo de parto y expulsión                                                                              | ①.SÍ ②.NO ⑧.NO SABE                                                                                                                                                                                                                  |                |
| 310                                                                    | Está presente un acompañante en algún momento del trabajo de parto                                                                                                                 | ①.SÍ ②.NO ⑧.NO SABE                                                                                                                                                                                                                  |                |
| 311                                                                    | Se lava las manos con agua y jabón o utiliza un antiséptico antes de cada exploración a la mujer                                                                                   | ①.SÍ ②. NO ⑧. NO SABE                                                                                                                                                                                                                |                |
| 312                                                                    | Utiliza guantes desinfectados o estériles                                                                                                                                          | ①.SÍ ②.NO ⑧.NO SABE                                                                                                                                                                                                                  |                |
| 313                                                                    | ¿Cuál fue el PRINCIPAL PROVEEDOR DE SALUD que atendió EL TRABAJO DE PARTO?<br><br>► Por favor especificar solo la persona principal que atendió el trabajo de parto.               | ①. MÉDICO<br>②. MÉDICO GINECÓLOGO<br>③. MÉDICO RESIDENTE<br>④. MÉDICO INTERNO<br>⑤. ESTUDIANTE DE MEDICINA<br>⑥. ENFERMERA<br>⑦. PASANTE DE ENFERMERÍA<br>⑧. ESTUDIANTE DE ENFERMERÍA<br>⑨. PARTERA<br>⑩. OTRO<br>ESPECIFICAR: ..... |                |
| 314                                                                    | ¿Hubieron OTROS PROVEEDORES DE SALUD que atendieron EL TRABAJO DE PARTO?<br><br>► Enliste todos los proveedores que atendieron el trabajo de parto aparte de la persona principal. | ①. MÉDICO<br>②. MÉDICO GINECÓLOGO<br>③. MÉDICO RESIDENTE<br>④. MÉDICO INTERNO<br>⑤. ESTUDIANTE DE MEDICINA<br>⑥. ENFERMERA<br>⑦. PASANTE DE ENFERMERÍA<br>⑧. ESTUDIANTE DE ENFERMERÍA<br>⑨. PARTERA<br>⑩. OTRO<br>ESPECIFICAR: ..... |                |
| 315                                                                    | ¿Cuántos proveedores, en total, atendieron el parto?                                                                                                                               | <input type="text"/>                                                                                                                                                                                                                 |                |

**ANEXO I**

**LISTA DE OBSERVACIONES DE TRABAJO DE PARTO Y EXPULSIÓN**

| No.                                                                            | PREGUNTA/ ACCIÓN                                                                                                                                                                                                                                                                                                                                                                                                        | CÓDIGO DE RESPUESTA                                                                                                                             | SALTAR A       |
|--------------------------------------------------------------------------------|-------------------------------------------------------------------------------------------------------------------------------------------------------------------------------------------------------------------------------------------------------------------------------------------------------------------------------------------------------------------------------------------------------------------------|-------------------------------------------------------------------------------------------------------------------------------------------------|----------------|
| <b>SECCIÓN 4: OBSERVACIÓN CONTINUA DE LA SEGUNDA Y TERCERA ETAPA DEL PARTO</b> |                                                                                                                                                                                                                                                                                                                                                                                                                         |                                                                                                                                                 |                |
| △                                                                              | REGISTRE SI EL PROVEEDOR DE SALUD REALIZÓ LAS SIGUIENTES ACCIONES Y/O EXAMENES (ALGUNOS PUEDEN REALIZARSE DE FORMA SIMULTÁNEA O POR MÁS DE UN PROVEEDOR)                                                                                                                                                                                                                                                                |                                                                                                                                                 |                |
| 400                                                                            | ¿SE OBSERVÓ ESTA SECCIÓN?                                                                                                                                                                                                                                                                                                                                                                                               | ①. SÍ ②. NO                                                                                                                                     | ②→500          |
| 401                                                                            | ¿Se realizó una episiotomía?                                                                                                                                                                                                                                                                                                                                                                                            | ①. SÍ ②. NO ⑧. NO SABE                                                                                                                          |                |
| 402                                                                            | OBSERVADOR(A): Anote la hora del parto<br>► Utilice el reloj de 24 horas                                                                                                                                                                                                                                                                                                                                                | HORAS <input type="text"/><br>MINUTOS <input type="text"/>                                                                                      |                |
| 403                                                                            | Presencia de segundo bebé                                                                                                                                                                                                                                                                                                                                                                                               | ①. SÍ (gemelar)<br>②. NO (producto único)                                                                                                       |                |
| 404                                                                            | Peso al nacimiento (en gramos); registre 9999 si no está disponible                                                                                                                                                                                                                                                                                                                                                     | <input type="text"/> <input type="text"/> <input type="text"/> <input type="text"/>                                                             |                |
| 405                                                                            | Uterotónico administrado                                                                                                                                                                                                                                                                                                                                                                                                | ①.SÍ ②.NO ⑧.NO SABE                                                                                                                             | ②→411<br>⑧→411 |
| 406                                                                            | OBSERVADOR(A): Anote la hora de administración del uterotónico<br>► Utilice el reloj de 24 horas                                                                                                                                                                                                                                                                                                                        | HORAS <input type="text"/><br>MINUTOS <input type="text"/>                                                                                      |                |
| 407                                                                            | Anotar el momento en que se administró el uterotónico:<br>a. Al nacimiento, hombro anterior<br>b. Dentro del primer minuto posterior al nacimiento del bebé<br>c. Dentro de los primeros 3 minutos posteriores al nacimiento del bebé<br>d. Más de 3 minutos después de nacido el bebé y ANTES de la expulsión de la placenta<br>e. Más de 3 minutos después de nacido el bebé Y DESPUES de la expulsión de la placenta | ①. Hombro anterior<br>②. 1 MIN POSTERIOR NAC.<br>③. 3 MINS POSTERIOR NAC.<br>④. +3 ANTES DE PLACENTA<br>⑤. +3 DESPUÉS DE PLACENTA<br>⑧. NO SABE |                |
| 408                                                                            | ¿Que uterotónico se administró?:<br>a. Oxitocina<br>b. Ergonovina<br>c. Sintometrína<br>d. Prostaglandina                                                                                                                                                                                                                                                                                                               | ①. OXITOCINA<br>②. ERGONOVINA<br>③. SINTOMETRINA<br>④. PROSTAGLANDINAS<br>⑧. NO SABE                                                            |                |
| 409                                                                            | DOSIS Y UNIDADES (e.j. UI, mg) del uterotónico administrado<br>► En caso necesario, preguntar/ revisar después                                                                                                                                                                                                                                                                                                          | DOSIS <input type="text"/><br>UNIDADES<br>①. UI<br>②. mg<br>③. ml<br>④. mcg                                                                     |                |
| 410                                                                            | Vía de administración del uterotónico                                                                                                                                                                                                                                                                                                                                                                                   | ①. IM<br>②. IV EN BOLO<br>③. IV POR GOTEO<br>④. IV POR GOTEO MÁS IM<br>⑤. ORAL<br>⑥. VAGINAL<br>⑦. SUBLINGUAL<br>⑧. RECTAL                      |                |

ANEXO I

LISTA DE OBSERVACIONES DE TRABAJO DE PARTO Y EXPULSIÓN

| No.                                                                            | PREGUNTA/ ACCIÓN                                                                                                                                                                                                                                                         | CÓDIGO DE RESPUESTA                                                                                                                                                                                                                  | SALTAR A |
|--------------------------------------------------------------------------------|--------------------------------------------------------------------------------------------------------------------------------------------------------------------------------------------------------------------------------------------------------------------------|--------------------------------------------------------------------------------------------------------------------------------------------------------------------------------------------------------------------------------------|----------|
| <b>SECCIÓN 4: OBSERVACIÓN CONTINUA DE LA SEGUNDA Y TERCERA ETAPA DEL PARTO</b> |                                                                                                                                                                                                                                                                          |                                                                                                                                                                                                                                      |          |
| △                                                                              | REGISTRE SI EL PROVEEDOR DE SALUD REALIZÓ LAS SIGUIENTES ACCIONES Y/O EXÁMENES (ALGUNOS PUEDEN REALIZARSE DE FORMA SIMULTÁNEA O POR MÁS DE UN PROVEEDOR)                                                                                                                 |                                                                                                                                                                                                                                      |          |
| 411                                                                            | OBSERVADOR(A): Anote la hora en que se pinzó el cordón umbilical<br>► Utilice el reloj de 24 horas                                                                                                                                                                       | HORAS <input type="text"/> <input type="text"/><br>MINUTOS <input type="text"/> <input type="text"/>                                                                                                                                 |          |
| 412                                                                            | Aplica tracción al cordón umbilical mientras realiza contracción (presión) suprapúbica                                                                                                                                                                                   | ①.SÍ ②.NO ③.NO SABE                                                                                                                                                                                                                  |          |
| 413                                                                            | Realiza masaje uterino inmediatamente después del parto                                                                                                                                                                                                                  | ①.SÍ ②.NO ③.NO SABE                                                                                                                                                                                                                  |          |
| 414                                                                            | Evalúa que la placenta y membranas estén completas                                                                                                                                                                                                                       | ①.SÍ ②.NO ③.NO SABE                                                                                                                                                                                                                  |          |
| 415                                                                            | Evalúa la presencia de laceraciones perineales y vaginales                                                                                                                                                                                                               | ①.SÍ ②.NO ③.NO SABE                                                                                                                                                                                                                  |          |
| 416                                                                            | ¿Participó más de un proveedor de salud en la atención del parto?                                                                                                                                                                                                        | ①.SÍ ②.NO                                                                                                                                                                                                                            |          |
| 417                                                                            | ¿Cuál fue el PRINCIPAL PROVEEDOR DE SALUD que atendió EL PARTO?<br>► Por favor especificar solo la persona principal que atendió el parto.                                                                                                                               | ①. MÉDICO<br>②. MÉDICO GINECÓLOGO<br>③. MÉDICO RESIDENTE<br>④. MÉDICO INTERNO<br>⑤. ESTUDIANTE DE MEDICINA<br>⑥. ENFERMERA<br>⑦. PASANTE DE ENFERMERÍA<br>⑧. ESTUDIANTE DE ENFERMERÍA<br>⑨. PARTERA<br>⑩. OTRO<br>ESPECIFICAR: ..... |          |
| 418                                                                            | ¿Hubieron otros PROVEEDORES DE SALUD que atendieron EL PARTO?<br>► Enliste todos los proveedores que atendieron el parto aparte de la persona principal.                                                                                                                 | ①. MÉDICO<br>②. MÉDICO GINECÓLOGO<br>③. MÉDICO RESIDENTE<br>④. MÉDICO INTERNO<br>⑤. ESTUDIANTE DE MEDICINA<br>⑥. ENFERMERA<br>⑦. PASANTE DE ENFERMERÍA<br>⑧. ESTUDIANTE DE ENFERMERÍA<br>⑨. PARTERA<br>⑩. OTRO<br>ESPECIFICAR: ..... |          |
| 419                                                                            | ¿Quién fue el PRINCIPAL PROVEEDOR DE SALUD que la atendió CUANDO NACIÓ SU BEBÉ (QUIÉN RECIBIÓ AL BEBÉ)?<br>► Esperar respuesta espontánea de la mujer.<br>► Por favor especificar solo la persona principal que la atendió cuando su bebé nació (quién recibió al bebé). | ①. MÉDICO<br>②. MÉDICO GINECÓLOGO<br>③. MÉDICO RESIDENTE<br>④. MÉDICO INTERNO<br>⑤. ESTUDIANTE DE MEDICINA<br>⑥. ENFERMERA<br>⑦. PASANTE DE ENFERMERÍA<br>⑧. ESTUDIANTE DE ENFERMERÍA<br>⑨. PARTERA<br>⑩. OTRO<br>ESPECIFICAR: ..... |          |

ANEXO I

LISTA DE OBSERVACIONES DE TRABAJO DE PARTO Y EXPULSIÓN

| No.                                                                                         | PREGUNTA/ ACCIÓN                                                                                                                                                                              | CÓDIGO DE RESPUESTA                                                                                                                                        | SALTAR A |
|---------------------------------------------------------------------------------------------|-----------------------------------------------------------------------------------------------------------------------------------------------------------------------------------------------|------------------------------------------------------------------------------------------------------------------------------------------------------------|----------|
| <b>SECCIÓN 4: OBSERVACIÓN CONTINUA DE LA SEGUNDA Y TERCERA ETAPA DEL PARTO</b>              |                                                                                                                                                                                               |                                                                                                                                                            |          |
| △                                                                                           | REGISTRE SI EL PROVEEDOR DE SALUD REALIZÓ LAS SIGUIENTES ACCIONES Y/O EXÁMENES (ALGUNOS PUEDEN REALIZARSE DE FORMA SIMULTÁNEA O POR MÁS DE UN PROVEEDOR)                                      |                                                                                                                                                            |          |
| 420                                                                                         | ¿Cuántos proveedores, en total, atendieron el parto?                                                                                                                                          | <input type="text"/>                                                                                                                                       |          |
| 421                                                                                         | ¿En qué posición parió la mujer?                                                                                                                                                              | ①. BOCA ARRIBA (LITOTOMIA)<br>②. SEMI-SENTADA<br>③. DECUBITO LATERAL IZQ.<br>④. SOBRE MANOS Y RODILLAS<br>⑤. EN CUCLILLAS<br>⑥. OTRO<br>ESPECIFICAR: ..... |          |
| <b>SECCIÓN 5: OBSERVACIÓN DE CUIDADOS NEONATALES INMEDIATOS, POSTNATALES Y DEL POSPARTO</b> |                                                                                                                                                                                               |                                                                                                                                                            |          |
| △                                                                                           | REGISTRE SI EL PROVEEDOR DE SALUD REALIZÓ LAS SIGUIENTES ACCIONES Y/O EXÁMENES (ALGUNOS PUEDEN REALIZARSE DE FORMA SIMULTÁNEA O POR MÁS DE UN PROVEEDOR)                                      |                                                                                                                                                            |          |
| 500                                                                                         | ¿SE OBSERVO ESTA SECCIÓN?                                                                                                                                                                     | ①.SÍ ②.NO                                                                                                                                                  | ②→600    |
| 501                                                                                         | Se encuentra presente un acompañante de la mujer durante el parto                                                                                                                             | ①.SÍ ②.NO ⑧.NO SABE                                                                                                                                        |          |
| 502                                                                                         | Se seca al bebé de forma inmediata con una toalla / tela                                                                                                                                      | ①.SÍ ②.NO ⑧.NO SABE                                                                                                                                        |          |
| 503                                                                                         | ¿El bebé está respirando / llorando?                                                                                                                                                          | ①.SÍ ②.NO                                                                                                                                                  | ②→514    |
| 504                                                                                         | ¿Se entrega el bebé a la madre de forma inmediata al parto o pocos minutos después?                                                                                                           | ①.SÍ ②.NO ⑧.NO SABE                                                                                                                                        |          |
| 505                                                                                         | ¿Se coloca al recién nacido en el abdomen de la mujer, haciendo contacto “piel con piel”?                                                                                                     | ①.SÍ ②.NO ⑧.NO SABE                                                                                                                                        | ②→507    |
| 506                                                                                         | ¿Se cubre al bebé con una toalla (o campo) seca?                                                                                                                                              | ①.SÍ ②.NO ⑧.NO SABE                                                                                                                                        |          |
| 507                                                                                         | Si no es colocado “piel con piel”, ¿se envuelve al bebé con una toalla (o campo) seca?                                                                                                        | ①.SÍ ②.NO ⑧.NO SABE                                                                                                                                        |          |
| 508                                                                                         | ¿Se amarra o pinza el cordón umbilical cuando las pulsaciones se detienen o a los 2-3 minutos después del parto (no de forma inmediata posterior a la expulsión)?                             | ①.SÍ ②.NO ⑧.NO SABE                                                                                                                                        |          |
| 509                                                                                         | ¿Se corta el cordón umbilical con una navaja o tijeras limpias?                                                                                                                               | ①.SÍ ②.NO ⑧.NO SABE                                                                                                                                        |          |
| 510                                                                                         | ¿Se inicia la lactancia materna dentro de la primera hora después del nacimiento?                                                                                                             | ①.SÍ ②.NO ⑧.NO SABE                                                                                                                                        |          |
| 511                                                                                         | Además de leche materna, ¿se le dio al bebé algún líquido para tomar dentro de la primera hora después del nacimiento?<br>► Observador(a): por favor contar líquidos aparte de leche materna. | ①.SÍ ②.NO ⑧.NO SABE                                                                                                                                        |          |
| 512                                                                                         | ¿Se bañó al bebé dentro de la primera hora después de nacido?                                                                                                                                 | ①.SÍ ②.NO ⑧.NO SABE                                                                                                                                        |          |
| 513                                                                                         | ¿Se mantuvo al bebé en contacto “piel con piel” con la madre durante la primera hora después de nacido?                                                                                       | ①.SÍ ②.NO ⑧.NO SABE                                                                                                                                        |          |

ANEXO I

LISTA DE OBSERVACIONES DE TRABAJO DE PARTO Y EXPULSIÓN

| No. | PREGUNTA/ ACCIÓN                                                                                                                                                                                                                                           | CÓDIGO DE RESPUESTA                                                                                  | SALTAR A |
|-----|------------------------------------------------------------------------------------------------------------------------------------------------------------------------------------------------------------------------------------------------------------|------------------------------------------------------------------------------------------------------|----------|
| △   | <b>SECCIÓN 5: OBSERVACIÓN DE CUIDADOS NEONATALES INMEDIATOS, POSTNATALES Y DEL POSPARTO</b><br>REGISTRE SI EL PROVEEDOR DE SALUD REALIZÓ LAS SIGUIENTES ACCIONES Y/O EXÁMENES<br>(ALGUNOS PUEDEN REALIZARSE DE FORMA SIMULTÁNEA O POR MÁS DE UN PROVEEDOR) |                                                                                                      |          |
| 514 | ¿Se toman los signos vitales de la madre a los 15 minutos después del parto?                                                                                                                                                                               | ①.SÍ ②.NO ③.NO SABE                                                                                  |          |
| 515 | ¿Se realiza una palpación del útero a los 15 minutos después de la expulsión de la placenta?                                                                                                                                                               | ①.SÍ ②.NO ③.NO SABE                                                                                  |          |
| 516 | Durante la primera exploración después del parto – durante o después de la 4 <sup>ta</sup> etapa del parto- ¿el proveedor busco o interrogó a la mujer sobre presencia de sangrado?                                                                        | ①.SÍ ②.NO ③.NO SABE                                                                                  |          |
| 517 | Durante la primera exploración después del parto – durante o después de la 4 <sup>ta</sup> etapa del parto- ¿el proveedor examinó el periné?                                                                                                               | ①.SÍ ②.NO ③.NO SABE                                                                                  |          |
| 518 | Durante la primera exploración después del parto - durante o después de la 4 <sup>ta</sup> etapa del parto- ¿el proveedor le tomó la temperatura a la mujer?                                                                                               | ①.SÍ ②.NO ③.NO SABE                                                                                  |          |
| 519 | Durante la primera exploración después del parto – durante o después de la 4 <sup>ta</sup> etapa del parto- ¿el proveedor le tomó la presión a la mujer?                                                                                                   | ①.SÍ ②.NO ③.NO SABE                                                                                  |          |
| 520 | Durante la primera exploración después del parto – durante o después de la 4 <sup>ta</sup> etapa del parto- ¿el proveedor revisó la involución uterina?                                                                                                    | ①.SÍ ②.NO ③.NO SABE                                                                                  |          |
| 521 | <b>Hora en la que se realiza la primera exploración física a la mujer después del parto</b><br>► Utilice el reloj de 24 horas                                                                                                                              | HORAS <input type="text"/> <input type="text"/><br>MINUTOS <input type="text"/> <input type="text"/> |          |
| 522 | <b>Hora de admisión a la sala de recuperación</b><br>► Utilice el reloj de 24 horas                                                                                                                                                                        | HORAS <input type="text"/> <input type="text"/><br>MINUTOS <input type="text"/> <input type="text"/> |          |

**ANEXO I**

**LISTA DE OBSERVACIONES DE TRABAJO DE PARTO Y EXPULSIÓN**

| No.                                                           | PREGUNTA/ ACCIÓN                                                                                                                                                                                                                                                       | CÓDIGO DE RESPUESTA                                                                                                                                                                                               | SALTAR A                         |
|---------------------------------------------------------------|------------------------------------------------------------------------------------------------------------------------------------------------------------------------------------------------------------------------------------------------------------------------|-------------------------------------------------------------------------------------------------------------------------------------------------------------------------------------------------------------------|----------------------------------|
| <b>SECCIÓN 6: REVISIÓN DE LA OBSERVACIÓN DE LABOR Y PARTO</b> |                                                                                                                                                                                                                                                                        |                                                                                                                                                                                                                   |                                  |
| △                                                             | EN CASO NECESARIO, REVISAR EL EXPEDIENTE CLÍNICO/ PREGUNTAR AL PROVEEDOR DESPUÉS DE LA OBSERVACIÓN                                                                                                                                                                     |                                                                                                                                                                                                                   |                                  |
| 600                                                           | ¿El proveedor completó un registro de la atención materna / neonatal?                                                                                                                                                                                                  | ①.SÍ ②.NO ③.NO SABE                                                                                                                                                                                               |                                  |
| 601                                                           | ¿El proveedor utilizó un partograma?                                                                                                                                                                                                                                   | ①.SÍ ②.NO ③.NO SABE                                                                                                                                                                                               | ②→603                            |
| 602                                                           | El partograma no se utilizó debido a que la mujer llegó al hospital en la segunda etapa del parto                                                                                                                                                                      | ①.SÍ ②.NO ③.NO SABE                                                                                                                                                                                               |                                  |
| 603                                                           | OBSERVADOR: ¿vio si el proveedor llenó el partograma después del parto? (con información que debió completar durante el trabajo de parto)                                                                                                                              | ①.SÍ ②.NO ③.NO SABE                                                                                                                                                                                               |                                  |
| 604                                                           | Registro del estado/ Resultado de la madre:<br>a. Enviada a sala de recuperación<br>b. Referida a un especialista en el mismo hospital<br>c. Entra a cirugía en el mismo hospital<br>d. Referida a otro hospital<br>e. Muerte materna                                  | ①. SALA DE RECUPERACIÓN<br>②. REFERIDA, MISMO HOSP.<br>③. CIRUGÍA<br>④. REFERIDA, OTRO HOSP.<br>⑤. FALLECIMIENTO                                                                                                  |                                  |
| 605                                                           | Registro del estado/ Resultado del bebé:<br>a. Enviada a cunero normal<br>b. Referido a un especialista en el mismo hospital<br>c. Referido a otro hospital<br>d. Enviado a la habitación con su madre<br>e. Muerte neonatal<br>f. Óbito reciente<br>g. Óbito macerado | ①. CUNERO<br>②. REFERIDO, MISMO HOSP.<br>③. REFERIDO, OTRO HOSP.<br>④. ALOJAMIENTO C/MADRE<br>⑤. MUERTE NEONATAL<br>⑥. ÓBITO RECIENTE<br>⑦. ÓBITO MACERADO                                                        |                                  |
| 606                                                           | Registre el tipo de nacimiento                                                                                                                                                                                                                                         | ①. VAGINAL<br>②. ASISTIDO, FORCEPS<br>③. ASISTIDO, VENTOSA<br>④. CESÁREA<br>⑤. NO SABE                                                                                                                            | ①→611<br>②→611<br>③→611<br>⑤→611 |
| 607                                                           | ¿La cesárea se realizó antes o después de iniciado el trabajo de parto?                                                                                                                                                                                                | ①. ANTES DE INICIADO TdP<br>②. DESPUÉS DE INICADO TdP<br>③. NO SABE                                                                                                                                               |                                  |
| 608                                                           | ¿Cuál fue la indicación para realizar la cesarea?                                                                                                                                                                                                                      | ①. SANGRADO EXCESIVO<br>②. PARTO OBSTRUIDO<br>③. PARTO PROLONGADO<br>④. RUPTURA UTERINA<br>⑤. MALA PRESENTACIÓN<br>⑥. SUFRIMIENTO FETAL<br>⑦. OTRO<br>ESPECIFICAR: .....<br>⑧. NO HUBO RAZÓN MÉDICA<br>⑨. NO SABE |                                  |
| 609                                                           | ¿En qué momento se tomó la decisión de realizar una cesárea?                                                                                                                                                                                                           | ①. ANTES DE INICIADO EL TdP<br>②. DESPUÉS DE INICIADO EL TdP<br>③. NO SABE                                                                                                                                        |                                  |



**ANEXO I**

**LISTA DE OBSERVACIONES DE TRABAJO DE PARTO Y EXPULSIÓN**

| No.                                                           | PREGUNTA/ ACCIÓN                                                                                                                                                                                                                                                                                                                                                                                                                                                                                                                                                                                                                                  | CÓDIGO DE RESPUESTA                                                                                                                                                            | SALTAR A |
|---------------------------------------------------------------|---------------------------------------------------------------------------------------------------------------------------------------------------------------------------------------------------------------------------------------------------------------------------------------------------------------------------------------------------------------------------------------------------------------------------------------------------------------------------------------------------------------------------------------------------------------------------------------------------------------------------------------------------|--------------------------------------------------------------------------------------------------------------------------------------------------------------------------------|----------|
| <b>SECCIÓN 6: REVISIÓN DE LA OBSERVACIÓN DE LABOR Y PARTO</b> |                                                                                                                                                                                                                                                                                                                                                                                                                                                                                                                                                                                                                                                   |                                                                                                                                                                                |          |
| △                                                             | EN CASO NECESARIO, REVISAR EL EXPEDIENTE CLÍNICO/ PREGUNTAR AL PROVEEDOR DESPUÉS DE LA OBSERVACIÓN                                                                                                                                                                                                                                                                                                                                                                                                                                                                                                                                                |                                                                                                                                                                                |          |
| 610                                                           | ¿Quién decidió que se realizaría una cesárea?                                                                                                                                                                                                                                                                                                                                                                                                                                                                                                                                                                                                     | ①. DOCTOR/ PROVEEDOR<br>②. MUJER<br>③. NO SABE                                                                                                                                 |          |
| 611                                                           | Registre si la madre tuvo alguna de la siguientes complicaciones:<br>a. Preeclampsia/eclampsia<br>b. Hemorragia<br>c. Obstrucción del canal de parto<br>d. Parto prolongado<br>e. Ruptura uterina<br>f. Infección puerperal                                                                                                                                                                                                                                                                                                                                                                                                                       | ①. PE/E<br>②. HEMORRAGIA<br>③. OBSTRUCCIÓN<br>④. PARTO PROLONGADO<br>⑤. RUPTURA UTERINA<br>⑥. SEPSIS<br>⑦. OTRA<br>ESPECIFICAR: .....<br>⑧. NINGUNA COMPLICACIÓN<br>⑨. NO SABE | ⑨→613    |
| 612                                                           | ¿En qué etapa del trabajo de parto ocurrió la complicación?                                                                                                                                                                                                                                                                                                                                                                                                                                                                                                                                                                                       | ①. ANTES DEL PARTO<br>②. DURANTE EL PARTO<br>③. POST PARTO<br>④. NO SABE                                                                                                       |          |
| 613                                                           | ¿Se administraron hemoderivados para manejo de hemorragia durante el trabajo de parto, parto o puerperio inmediato?                                                                                                                                                                                                                                                                                                                                                                                                                                                                                                                               | ①. SÍ<br>②. NO<br>③. NO SABE                                                                                                                                                   |          |
| 614                                                           | ¿Solicitó la mujer algún medicamento para el manejo del dolor durante el trabajo de parto, parto o puerperio inmediato?                                                                                                                                                                                                                                                                                                                                                                                                                                                                                                                           | ①. SÍ<br>②. NO<br>③. NO SABE                                                                                                                                                   |          |
| 615                                                           | ¿Recibió la mujer algún medicamento para el manejo del dolor durante el trabajo de parto, parto o puerperio inmediato?                                                                                                                                                                                                                                                                                                                                                                                                                                                                                                                            | ①. SÍ<br>②. NO<br>③. NO SABE                                                                                                                                                   |          |
| 616                                                           | ¿Recibió la mujer algún antibiótico durante el trabajo de parto, parto o puerperio inmediato?                                                                                                                                                                                                                                                                                                                                                                                                                                                                                                                                                     | ①. SÍ<br>②. NO<br>③. NO SABE                                                                                                                                                   |          |
| 617                                                           | <b>Hora en que finaliza la observación de labor y parto</b><br>► Utilice el reloj de 24 horas                                                                                                                                                                                                                                                                                                                                                                                                                                                                                                                                                     | HORAS <input type="text"/> <input type="text"/><br>MINUTOS <input type="text"/> <input type="text"/>                                                                           |          |
| 618                                                           | NOTAS ESCRITAS DEL (DE LA) OBSERVADOR(A).<br>En particular, comentar sobre lo siguiente:<br><br>• ¿La mujer fue tratada con respeto? ¿Se le informó de los procedimientos para ella y para su bebé?<br>• ¿Cómo describiría la situación: caótica o calmada y ordenada?<br>• ¿Hubieron demoras para recibir tratamiento/manejo necesario? En caso afirmativo, ¿para qué tipo de procedimientos (madre o bebé) y por qué? ¿Estuvieron involucrados múltiples proveedores de salud?<br>¿Quiénes?<br>• En caso de que el bebé haya muerto, ¿se dio consejería a la madre?<br>• En caso de que no se haya completado la observación, explique por qué. |                                                                                                                                                                                |          |
